# 1 *Mycena* genomes resolve the evolution of fungal bioluminescence

2

3 Huei-Mien Ke<sup>1</sup>, Hsin-Han Lee<sup>1</sup>, Chan-Yi Ivy Lin<sup>1,2</sup>, Yu-Ching Liu<sup>1</sup>, Min R. Lu<sup>1,3</sup>, Jo-  
4 Wei Allison Hsieh<sup>3,4</sup>, Chiung-Chih Chang<sup>1,5</sup>, Pei-Hsuan Wu<sup>6</sup>, Meiyeh Jade Lu<sup>1</sup>, Jeng-  
5 Yi Li<sup>1</sup>, Gaus Shang<sup>7</sup>, Rita Jui-Hsien Lu<sup>2,8</sup>, László G. Nagy<sup>9</sup>, Pao-Yang Chen<sup>3,4</sup>, Hsiao-  
6 Wei Kao<sup>5</sup> and Isheng Jason Tsai<sup>1,3</sup>

7

8 <sup>1</sup> Biodiversity Research Center, Academia Sinica, Taipei, Taiwan

9 <sup>2</sup> Department of Molecular, Cellular and Developmental Biology, Yale University, New Haven,  
10 Connecticut 06520, USA

11 <sup>3</sup> Genome and Systems Biology Degree Program, Academia Sinica and National Taiwan  
12 University, Taipei, Taiwan

13 <sup>4</sup> Institute of Plant and Microbial Biology, Academia Sinica, Taipei, Taiwan

14 <sup>5</sup> Department of Life Sciences, National Chung Hsing University, Taichung, Taiwan

15 <sup>6</sup> Master Program for Plant Medicine and Good Agricultural Practice, National Chung Hsing  
16 University, Taiwan

17 <sup>7</sup> Department of Biotechnology, Ming Chuan University, Taiwan

18 <sup>8</sup> Department of Medicine, Washington University in St. Louis, St. Louis, MO 63110, USA

19 <sup>9</sup> Synthetic and Systems Biology Unit, Biological Research Centre, 6726 Szeged, Hungary

20

21 Correspondence: Huei-Mien Ke [cotton@sinica.edu.tw](mailto:cotton@sinica.edu.tw) and Isheng Jason Tsai

22 [ijtsai@sinica.edu.tw](mailto:ijtsai@sinica.edu.tw)

23

## 24 **Abstract**

25 Mushroom-forming fungi in the order Agaricales represent an independent origin of  
26 bioluminescence in the tree of life, yet the diversity, evolutionary history, and timing of  
27 the origin of fungal luciferases remain elusive. We sequenced the genomes and  
28 transcriptomes of five bonnet mushroom species (*Mycena* spp.), a diverse lineage  
29 comprising the majority of bioluminescent fungi. We show that bioluminescence  
30 evolved in the common ancestor of *Mycena* spp. and the marasmioid clade of  
31 Agaricales and was maintained through at least 160 million years of evolution. We  
32 revealed *Mycena* exhibit two-speed genomes and resolve how the luciferase cluster was  
33 derived by duplication and translocation, frequently rearranged and lost in most *Mycena*  
34 species, but conserved in the *Armillaria* lineage. Luciferase cluster members were co-  
35 expressed across developmental stages, with highest expression in fruiting body caps  
36 and stipes, suggesting fruiting-related adaptive functions. Our results contribute to  
37 understanding a *de novo* origin of bioluminescence and the corresponding gene cluster  
38 in a diverse group of enigmatic fungal species.

39 The genus *Mycena* (Pers.) Roussel, comprises approximately 600 small mushroom  
40 species widely distributed around the world<sup>1</sup>. Also known as bonnet mushrooms,  
41 *Mycena* species are usually characterised by a bell-shaped cap, a thin stem (**Fig. 1a**),  
42 and a gilled or poroid hymenophore<sup>2</sup>. *Mycena* also have a diversity of life history  
43 strategies; while many species are saprotrophic, they can be pathogens as well as  
44 mycorrhizal<sup>3</sup>. Despite its vast diversity of lifestyles and phenotypes, there are many  
45 outstanding questions concerning the basic biology, ecology and genomics of this genus.  
46 One particular fascinating trait is bioluminescence, which more than half of the 81  
47 recorded luminescent fungi belong to *Mycena*<sup>4</sup>. Yet, bioluminescence occurs only in a  
48 small percentage of this genus, suggesting an intricate loss/gain history and potential  
49 convergence within the genus.

50

51 Fungal light emission involves two main steps. First, a luciferin precursor of hispidin  
52 is hydroxylated by hispidin-3-hydroxylase (H3H) into 3-hydroxyhispidin (luciferin)<sup>5</sup>.  
53 Oxygen is then added to the luciferin by luciferase, producing a high energy  
54 intermediate which is subsequently decomposed, yielding light emission. Previously,  
55 Kotlobady *et al.* have identified the fungal luciferase, which is physically adjacent to  
56 these enzymes and forms a gene cluster containing luciferase, hispidin synthase and  
57 H3H<sup>6</sup>. This cluster was found to be conserved across bioluminescent fungi of three  
58 lineages: *Armillaria*, mycenoid and *Omphalotus*<sup>6</sup>. Phylogeny reconstruction suggested  
59 that luciferase originated in early Agaricales. *Armillaria* and *Omphalotus* belong to the  
60 marasmioid clade, whereas *Mycena* was recently found to be sister of the marasmioid  
61 clade<sup>7</sup>. Recent genome sequencing efforts in the marasmioid clade revealed diverse  
62 genomic and life history traits, including genome expansion and pathogenicity in  
63 *Armillaria* spp.<sup>8</sup>, novel wood decay strategies<sup>9</sup> or fruiting body development<sup>10</sup>.  
64 Genomes of two *Mycena* species were sequenced<sup>6</sup>, however, the fragmented assemblies  
65 (N50 5.8–16.7 kb) impeded comparative genomic analyses of features such as synteny<sup>11</sup>.  
66 These resources provide a substrate for studies of genome evolution and of  
67 bioluminescence in fungi, however, several key questions are still unknown from an  
68 evolutionary perspective. Here, we set out to identify novel genes involved in  
69 bioluminescence, understand how the luciferase cluster was lost or retained, and  
70 whether there are levels of variation in this cluster across these lineages.

71

72 To gain insights into the evolution of fungal bioluminescence and the ecology of  
73 mycenoid, we sequenced the genomes of four bioluminescent (*Mycena chlorophos*, *M.*  
74 *kentingensis*, *M. sanguinolenta* and *M. venus*) and one non-bioluminescent (*M.*  
75 *indigotica*) species. We conducted comparative genomics with representative genomes  
76 of all bioluminescent fungal clades, putting particular emphasis on genome-wide

77 synteny to investigate the evolutionary dynamics of the luciferase gene cluster through  
78 hundreds of millions of years. The variability in genome sizes among *Mycena* is likely  
79 associated with the differential expansion of repeats in the genomes, potentially due to  
80 the differential control on repeat activity by DNA methylation. The transcriptome of  
81 bioluminescent mycelium correctly revealed the luciferase cluster and co-expression  
82 analyses identified further genes that may be relevant to bioluminescence and  
83 development. Based on comparative analyses from fifteen available genomes of  
84 bioluminescent fungi, we reconstructed and presented a model for evolution of fungal  
85 bioluminescence.

86

## 87 **Results**

88

### 89 **Assemblies and annotations of five *Mycena* species**

90 We sequenced the genomes of the bioluminescent fungi *Mycena chlorophos*, *M.*  
91 *kentingensis*, *M. sanguinolenta* and *M. venus*, as well as the non-bioluminescent *M.*  
92 *indigotica* (**Fig. 1a**). These species were chosen for their phylogenetic positions  
93 (Supplementary Fig. 1) and because they displayed different bioluminescence  
94 intensities. An assembly was produced for each species using a combination of Illumina  
95 and Oxford Nanopore reads (Supplementary Table 1). The nuclear genomes were 50.9–  
96 167.2 Mb with two amongst the largest for the Agaricales. The assemblies consisted of  
97 30–155 contigs with N50 4.1–17.8 Mb (Supplementary Table 2), which were  
98 comparable to representative fungal reference assemblies and allowed for synteny  
99 comparisons<sup>11</sup>. Stretches of TTAGGG hexamers were identified at the end of scaffolds,  
100 indicating telomeric repeats commonly found in Agaricales<sup>12,13</sup>. The largest scaffolds  
101 in *M. indigotica* and *M. kentingensis* were telomere-to-telomere, indicating gapless  
102 chromosomes. Mitochondrial genomes in these species were assembled into single  
103 circular contigs of 88.3–133 kb (Supplementary Fig. 2).

104

105 Using a combination of reference fungal protein homology support and mycelium  
106 transcriptome sequencing (Supplementary Table 3), 13,940–26,334 protein encoding  
107 genes were predicted in the *Mycena* genomes using MAKER2<sup>14</sup> pipeline, and were  
108 92.1–94.8% complete (Supplementary Table 2) based on BUSCO<sup>15</sup> analysis. Orthology  
109 inference using Orthofinder<sup>16,17</sup> placed these genes models and those of 37 other  
110 basidiomycetes genomes (Supplementary Table 4) into 22,244 orthologous groups  
111 (OGs; Supplementary Table 5). Of these OGs, 44.3% contained at least one orthologue  
112 from other basidiomycete, while 15–29% of the proteomes were found exclusively in  
113 each *Mycena* species (Supplementary Table 6). The genome sizes were positively  
114 correlated with proteome sizes, with the largest (*M. sanguinolenta*) and smallest (*M.*

115 *chlorophos*) varying two- and three-fold, respectively. Interestingly, the mitochondrial  
 116 genomes were larger in species with smaller genomes, and this was due to various genes  
 117 having gained an extensive number of introns (Supplementary Fig. 2). We assessed  
 118 orthologous group evolution by analysing OG distribution dynamics along a time-  
 119 calibrated phylogeny using CAFÉ<sup>18</sup>. Gene family changes were comparable to those of  
 120 other branches of Agaricales. A total of 589 orthologous groups were expanded at the  
 121 origin of the mycenoid lineage (Supplementary Fig. 3). Analysis of gene ontology terms  
 122 showed that these genes were enriched in iron ion binding, transferase activity, DNA-  
 123 binding transcription factor activity, and monooxygenase and dioxygenase activities,  
 124 suggesting that these genes were necessary for mycenoid species adapting to different  
 125 environments (Supplementary Table 7).  
 126

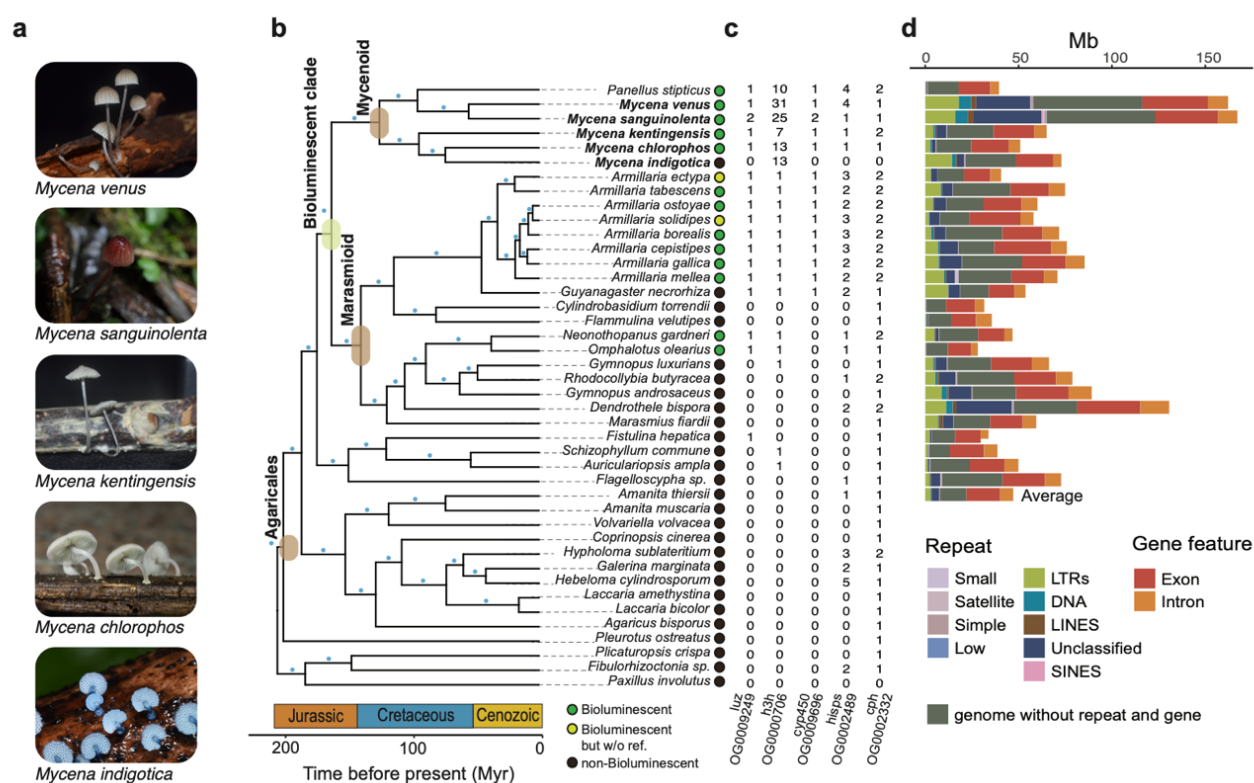

1:

128

129 **Fig. 1| Phylogenomic analysis of *Mycena* and related fungi.** **a**, The five species sequenced  
 130 in this study. **b**, Species trees inferred from a concatenated supermatrix of the gene alignments  
 131 using the 360 single-copy orthogroups. X-axis denotes divergence time estimates. Blue dot on  
 132 a branch indicates a bootstrap value > 90. **c**, Gene copy number in the orthologous groups (OG)  
 133 associated with luciferin biosynthesis pathway including luciferase (*luz*), hispidin-3-  
 134 hydroxylase (*h3h*), hispidin synthase (*hisps*), cytochrome P450 (*cyp450*) and caffeylpyruvate  
 135 hydrolase (*cph*). **d**, Genome sizes for 42 species broken down by repeat types and gene features.

136 Averaged content in the genomes of 14 outgroup species are indicated as one bar. Repeats  
137 including transposable elements (TEs): long terminal repeats (LTRs), long interspersed nuclear  
138 elements (LINES), short interspersed nuclear elements (SINEs), DNA transposons (DNA), and  
139 other types of repeats: small RNA (Small), simple repeats (Simple), and low complexity repeats  
140 (Low).

141

## 142 **A single origin of bioluminescent fungi in the ancestor of *Mycena* and the** 143 **marasmioid clade**

144 Phylogenomic analyses based on single-copy orthologue sets have placed *Mycena*  
145 sister to the marasmioid clade, including *Armillaria* and *Omphalotus*, which are the  
146 other two lineages in which bioluminescent species have been identified. This species  
147 phylogeny was recovered in both maximum likelihood analysis<sup>19</sup> of a concatenated  
148 supermatrix of single-copy gene alignments (**Fig. 1b**) and coalescent-based analysis  
149 using the 360 gene trees<sup>20</sup> (Supplementary Fig. 4). In our four bioluminescent *Mycena*  
150 species, we identified genes involved in luciferin biosynthesis and their orthologues  
151 across species (**Fig. 1c**). Phylogenies of individual gene families were congruent with  
152 the species tree (Supplementary Fig. 5 (a–e)). In contrast to a previous report<sup>6</sup>, our  
153 results suggest that the functional luciferase originated in the last common ancestor of  
154 mycenoid and marasmioid clade rather than in that of the Agaricales (**Fig. 1b**). The  
155 ancestral luciferase was initially duplicated in the last common ancestor of this large  
156 group and Schizophyllaceae and subsequently acquired bioluminescence ability after  
157 speciation (**Fig. 1c**; Supplementary Fig. 5a). Using MCMCtree<sup>21</sup> with three fossil  
158 calibrations, we estimated the age of mycenoid most recent common ancestor to be  
159 105–147 million years ago (Mya) in the Cretaceous (**Fig. 1b**). This is consistent with  
160 recent estimates (78–110<sup>7</sup> and mean 125<sup>1</sup> Mya) and overlaps with the initial rise and  
161 diversification of angiosperms<sup>22</sup>, suggesting that they are ecologically associated with  
162 fungi acting as saprotrophs or mycorrhizal partners<sup>3</sup>. Finally, the age of  
163 bioluminescence which was also the age of functional luciferase in fungi was estimated  
164 to originate around 160 million years ago during the late Jurassic (**Fig. 1b**).

165

## 166 **Interplay between transposable elements and DNA methylation in *Mycena***

167 Similar to other fungal genomes<sup>23,24</sup>, much of the variation in the *Mycena* nuclear  
168 genome can be explained by repetitive DNA content (Supplementary Table 8). Only  
169 11.7% of the smallest genome (*M. chlorophos*) was repeats, which is in stark contrast  
170 to the 39.0% and 35.7% in *M. sanguinolenta* and *M. venus*, respectively. The majority  
171 of transposable elements in *Mycena* were long terminal repeats (LTRs) retrotransposons  
172 (60–85%), followed by DNA transposable elements (11%–24%) (**Fig. 1d** and  
173 Supplementary Table 8). Interestingly, the larger genomes of *M. sanguinolenta* and *M.*



174 *venus* contained the lowest proportion of LTRs (24.9 and 31.1%, respectively), but  
175 highest proportion of unclassified repeats (55.4 and 50.3%, respectively)  
176 (Supplementary Table 8). 16.6–36.5% of the unclassified repeat families shared 53.8–  
177 60.5% nucleotide identity with known transposable elements, suggesting they were  
178 degenerated copies which we defined as relic TEs (Supplementary Table 9). **Fig. 2a**  
179 shows that the largest assembled chromosome of *M. indigotica* exhibits high protein-  
180 coding gene content and low transposable element density at scaffold centres, which is  
181 typical of fungal chromosomes<sup>25,26</sup>. Such observations were consistent across large  
182 *Mycena* scaffolds (typically >1 Mb), suggesting that our assemblies were robust enough  
183 to capture evolutionary dynamics across chromosomes.

184  
185 We detected DNA methylation levels of 5-methylcytosine (5mC) across the five  
186 *Mycena* assemblies using Nanopore long reads. CG sites were found either highly  
187 (mCG level >60%) or weakly methylated (<15%) in gene body, displaying a bimodal  
188 distribution (Supplementary Fig. 6). Such a bimodal distribution has also been observed  
189 in plants, animals, and other fungi, including *Tuber melanosporum* and  
190 *Pseudogymnoascus destructans*<sup>27-32</sup>. Within *Mycena*, the CG methylation in genes  
191 (5.4–10.5%) was much lower than that in repeats—i.e., TEs and unclassified repeats  
192 (11.6–84.5%) (**Fig. 2b**; Supplementary Table 10)—suggesting that DNA methylation  
193 may have a specific effect on repeats. Except for DNA transposons in *M. kentingensis*,  
194 LTR retrotransposons had the highest CG methylation levels of all types of transposable  
195 elements (**Fig. 2b**). Furthermore, CG methylation in relic TEs was clearly lower than  
196 that in classic TEs (Supplementary Table 10). Among the *Mycena* species, we found  
197 that *M. sanguinolenta* and *M. venus* with larger genomes and higher repeat content had  
198 lower levels of methylation in the repeats, and the repeat methylation was much higher  
199 in *M. indigotica*, *M. chlorophos*, and *M. kentingensis*, which have smaller genomes (**Fig.**  
200 **2c**). The same pattern was also observed in genes, though they had fewer changes in  
201 their methylation level than did repeats. Our results indicate that the variant  
202 composition of repeats is differentially mediated by DNA methylation among closely-  
203 related *Mycena* species. Hence, genome expansion in *Mycena* was likely a result  
204 associated with transposable element proliferation and the accumulation of relic TEs,  
205 which yielded reduced methylation in active copies; this is also observed in some plants,  
206 e.g., *Arabis alpine*<sup>33</sup> and *Manihot esculenta*<sup>34</sup>.

207

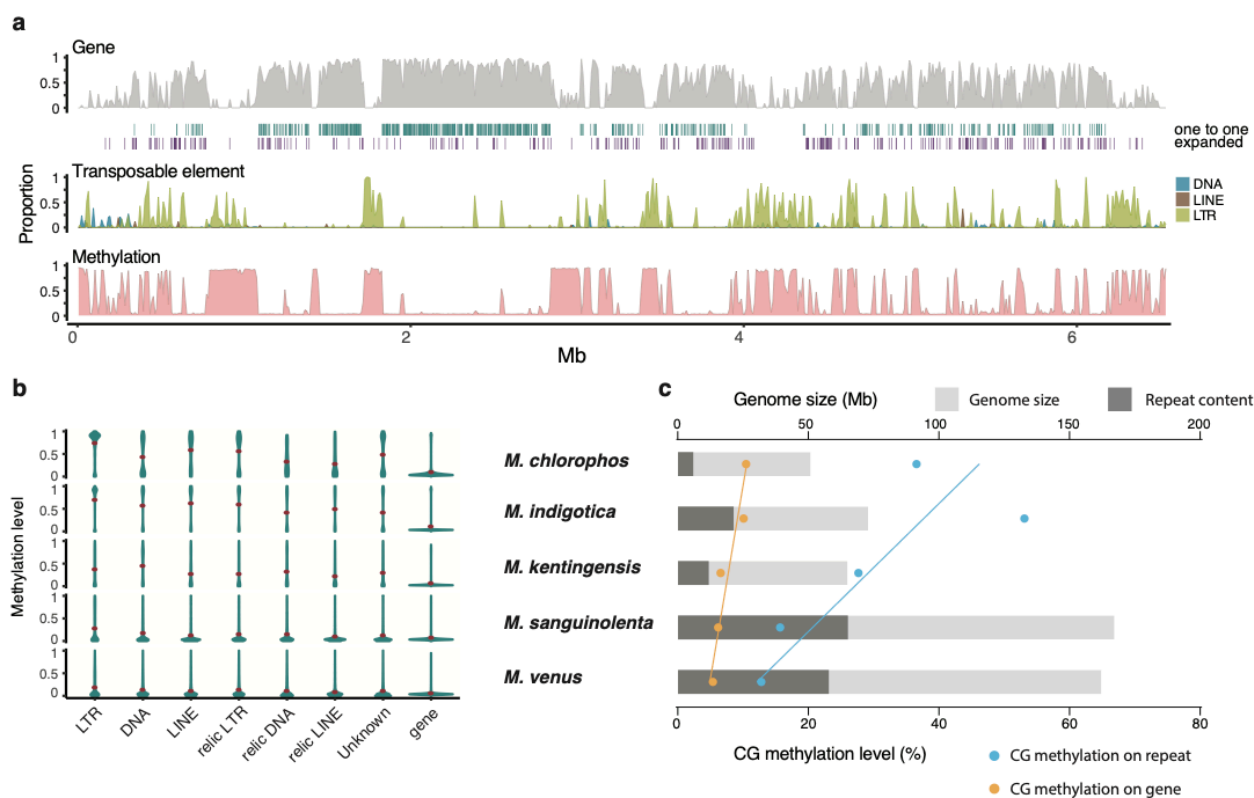

209

210 **Fig. 2| Distribution of *Mycena* genome features.** **a**, *M. indigotica* chromosome one. For every  
 211 non-overlapping 10-kb window, the distributions from top to bottom are: (1) Gene density  
 212 (percentage of nucleotides coverage). Stripes under this window denotes gene positions. Green  
 213 stripe: gene containing single-copy orthologue with *M. chlorophos*. Purple stripe: gene  
 214 expansion in individual species identified by CAFÉ. (2) Density of transposable elements (TEs),  
 215 including LTRs, LINES, and DNA. (3) Average methylation level called from CpG sites per  
 216 window. The high methylation window generally clustered in high TE regions with low gene  
 217 density. **b**, The methylation level in genes and different types of repeats. **c**, The relationships  
 218 among genome size, number of repeats and CG methylation levels in *Mycena*.

219

220

221

222

223

224

225

226

227

228

## 229 Core/dispensable genome partitioning based on synteny

230 We compared the patterns of 4,452 single-copy orthologue pairs between assemblies of  
231 *Mycena indigotica* and *Armillaria ectypa* (Supplementary Fig. 7). The majority of  
232 scaffolds between the two species were assigned to one-one relationship  
233 unambiguously, providing strong evidence that macro-synteny has been conserved  
234 between the marasmioid and mycenoid clades. There was no evidence of whole genome  
235 duplication events. Such chromosome-level synteny is also conserved in the common  
236 ancestor of Agaricales (Supplementary Fig. 8). The *M. indigotica* scaffolds typically  
237 exhibit high orthologous gene density in the centres of scaffolds (**Fig. 2a**), and multi-  
238 genome comparison showed that synteny conservation was lost across the *Mycena*  
239 assemblies. Based on differential synteny exhibited across genomes, we further  
240 partitioned the scaffolds into core and dispensable regions (Methods). **Fig. 3a** shows  
241 that the core regions were typically at the scaffold centres of the *Mycena* species. In  
242 contrast, the dispensable regions can extend to a few mega-bases, even to entire  
243 scaffolds, as was the case for the largest (12.0 Mb) assembled scaffold of *M. venus* (**Fig.**  
244 **3a**). These dispensable regions are highly enriched in repeats; they have a 3–8-fold  
245 higher methylation level and are overrepresented in expanded and contracted OGs  
246 compared to the core regions (**Fig 3b**; Supplementary Table 11; two-proportions z-test,  
247  $P < 2.2E-16$ ). Expansions and contractions were 3.5–6.7 and 2–3.5-fold higher in the  
248 dispensable regions, respectively. The observation that half the relative sequence  
249 coverage was independent to other scaffolds suggests that some of these dispensable  
250 scaffolds have aneuploidy (**Fig. 3c**). Two large scaffolds (>1Mb) displaying half the  
251 relative depth of coverage were present in *M. venus* (scaffold01; 12 Mb) and *M.*  
252 *sanguinolenta* (scaffold12; 4.5 Mb), both of which have larger genome sizes compared  
253 to other species. Interestingly, these scaffolds exhibit higher repeat content with reduced  
254 methylation level, as well as expanded proteins which resembles the lineage-specific  
255 chromosomes observed in some fungi<sup>35</sup>. For example, scaffold12 of *M. sanguinolenta*  
256 contains 32 copies of expanded ARD domain (PF03079) encoded by 31 proteins, which  
257 is involved in the methionine salvage pathway modulating cell division<sup>36</sup> (**Fig. 3d**).  
258 Together, these results suggest that some *Mycena* genomes possessed two-speed  
259 genomes similar to filamentous pathogenic fungi where genomes are  
260 compartmentalised into gene-dense and gene-sparse regions enriched in transposable  
261 elements<sup>37</sup>. Differential gain and loss of genes in the dispensable regions may have  
262 important implications for *Mycena*.

263

264



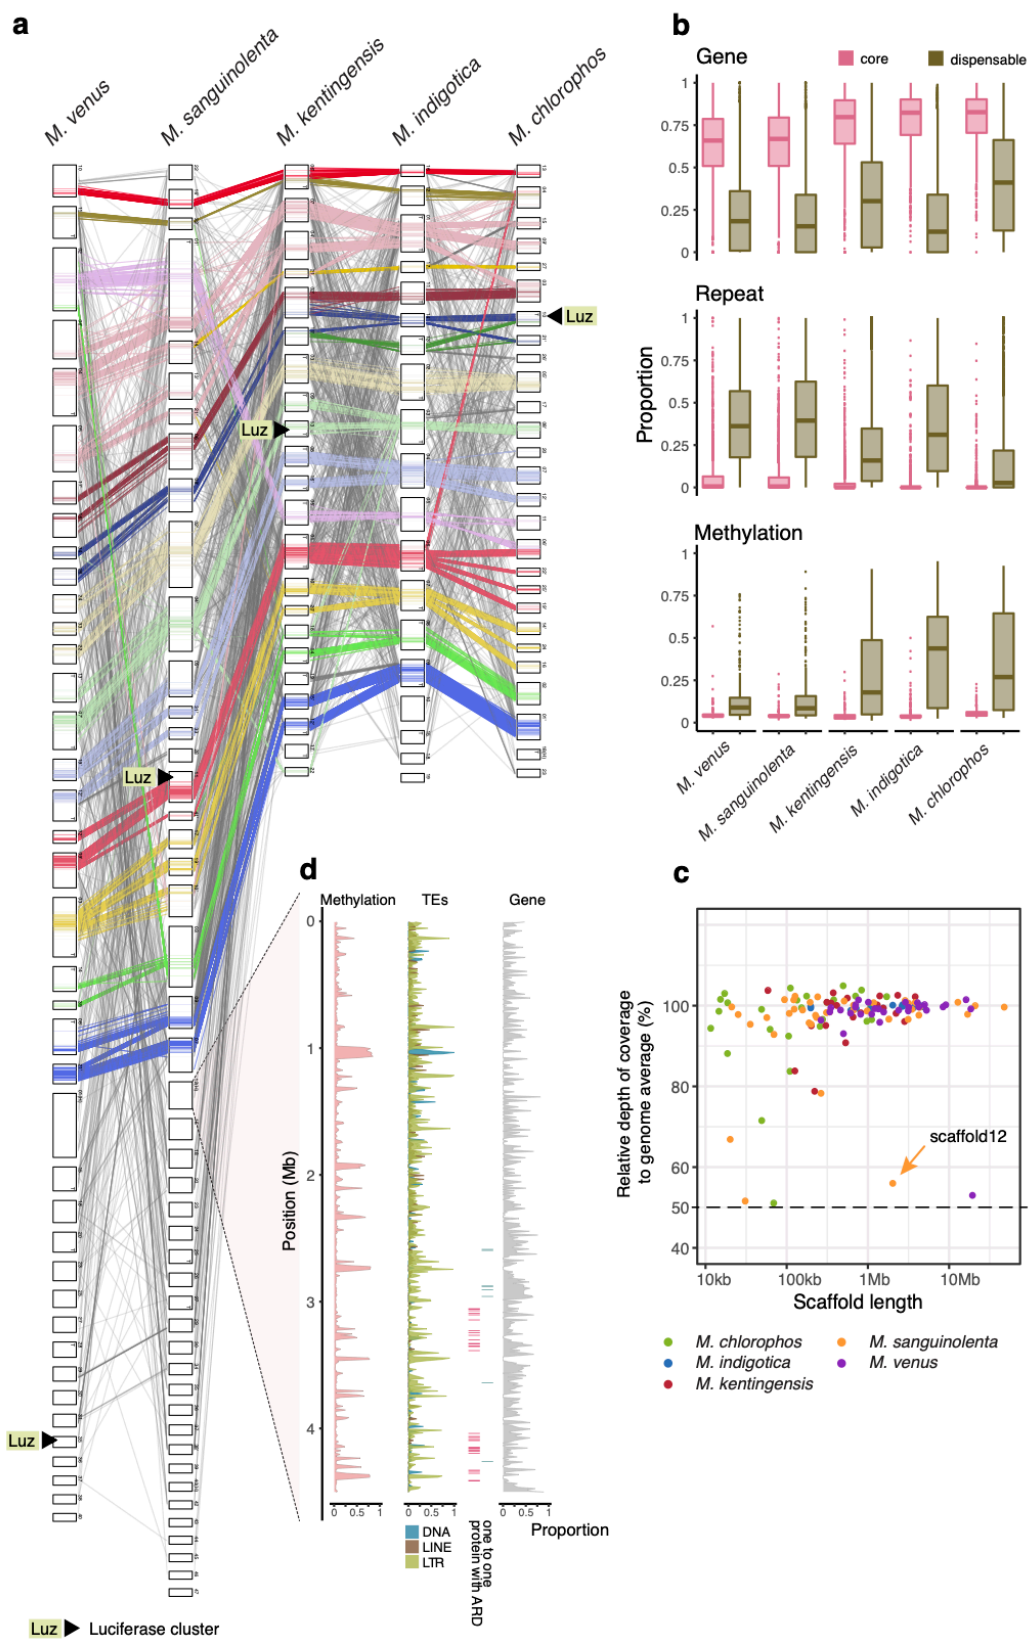

266 **Fig. 3| The core and dispensable regions of scaffolds and anchoring for the four *Mycena***  
267 **species scaffolds to *M. indigotica* reference genomes. a,** Schematic representation of the  
268 inter-scaffold relationship between species. The links between scaffolds denoted the pairwise  
269 single-copy orthologues with closest related species. The core (coloured region in box) and  
270 dispensable regions in each scaffold were defined by the consecutive genes with less than 90  
271 percent genetic distance to the adjacent one. The black triangle denotes the luciferase cluster.  
272 **b,** The gene density, repeat density and methylation level in core or dispensable regions. The  
273 gene and repeat densities are calculated from the non-overlapping 10-kb window located in  
274 the core or dispensable regions. The methylation level was calculated from the mean CG  
275 methylation level in core or dispensable regions. **c,** Sequence coverage was measured by the  
276 average number of reads that aligned to known reference bases per 10-kb non-overlapping  
277 windows with mosdepth<sup>38</sup>. Sequence coverage across scaffolds were normalized by the  
278 median coverage. The windows with more than 25% TEs were omitted. The coverage of each  
279 scaffold is normalized by the median coverage among the scaffolds longer than N90 in five  
280 species, except the Msan.scaffold36, which has 4-fold higher coverage than median coverage.  
281 **d,** Scaffold12 of *M. sanguinolenta* with expansion of proteins with the ARD domain. For  
282 every non-overlapping 10-kb window, the distribution from right to left is: (1) Density  
283 (percentage of nucleotides coverage) of gene. Green stripe denotes a gene containing single-  
284 copy orthologue with *M. venus*. Red stripe denotes the proteins with the ARD domain. (2)  
285 Density of transposable elements (TEs) including LTRs, LINES and DNA. (3) Average  
286 methylation level called from CpG sites per window.

287

### 288 **Evolutionary dynamics of luciferase clusters**

289 One of the previous challenges in addressing the evolution of fungal bioluminescence  
290 was that the bioluminescent species were scattered across the mycenoid and  
291 marasmioid clades, and this could only be explained by frequent loss of luciferase  
292 clusters. We used all the highly contiguous assemblies across the bioluminescent  
293 lineages in hand to investigate synteny around the luciferase cluster (**Fig. 4**). The genes  
294 surrounding the luciferase cluster among the eight *Armillaria* species generally shared  
295 the same order, but collinearity was partially lost in *G. necrorhiza* (**Fig. 4**). We  
296 reconstructed the ancestral upstream and downstream gene synteny of the *Armillaria*  
297 luciferase cluster and found that each belonged to different core regions of the same  
298 chromosome, suggesting that these regions were previously rearranged—including the  
299 luciferase cluster—and were subsequently retained (Supplementary Fig. 10).

300

301

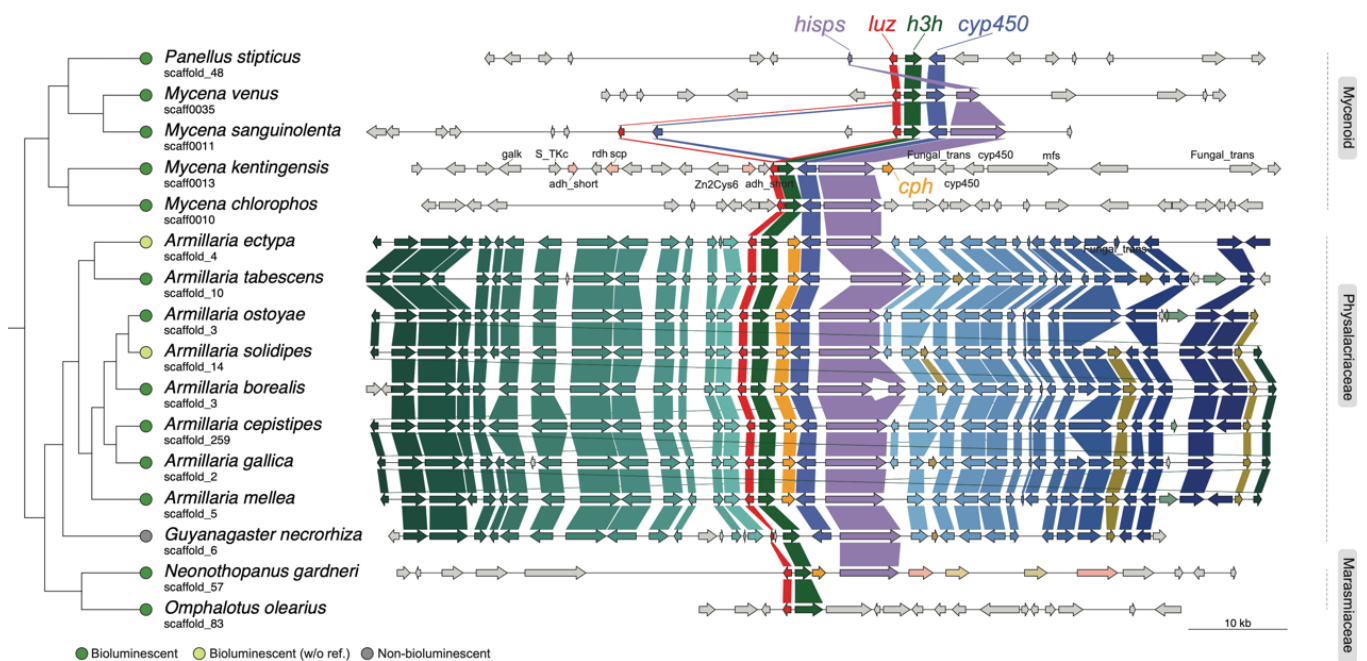

303

304 **Fig. 4| Synteny around the luciferase cluster among bioluminescent fungi.** The orthologous  
 305 groups (OGs) shared by at least two species were labelled with the same colour, regardless of  
 306 their orientation. The *cph* gene in some species was located in other scaffolds (Supplementary  
 307 Fig. 9)

308

309 In contrast, the *Mycena* luciferase cluster was identified in the dispensable regions of  
 310 different linkage groups (**Fig. 3a**), suggesting that the location of the cluster was  
 311 extensively rearranged since the common ancestor of this lineage. A physical linkage  
 312 was only maintained in the luciferase cluster, but no synteny was found in adjacent  
 313 genes (**Fig. 4**). Variations were common amongst the markup of the luciferase cluster.  
 314 The majority of the *Mycena* luciferase clusters included luciferase (*luz*), hispidin-3-  
 315 hydroxylase (*h3h*), cytochrome P450 (*cyp450*), and hispidin synthase (*hisps*) (**Fig. 4**).  
 316 caffeylpyruvate hydrolase (*cph*) was located in different scaffolds in four of the five  
 317 *Mycena* species (Supplementary Fig. 9). In *M. sanguinolenta*, *luz* and *cyp450* were  
 318 duplicated adjacent to the luciferase cluster (**Fig. 4**). Losses were observed in different  
 319 positions of the phylogeny. The non-bioluminescent *M. indigotica* lost the entire  
 320 luciferase cluster, but an *h3h* homologues were found in other regions of the genome,  
 321 while *Guyanagaster necrorhiza* has a partial luciferase<sup>6</sup> and three other enzymes (**Fig.**  
 322 **4**), suggesting an independent loss of luciferase function alone was enough for it to lose  
 323 its bioluminescence. Selection analysis of genes in the luciferase cluster revealed that  
 324 the majority of conserved sites exhibit either no or strong purifying selection, with only  
 325 7–28 sites under episodic selection (Supplementary Fig. 11). Together, these results  
 326 indicate limited but conserved roles of bioluminescence in the species that have retained

327 bioluminescence.

328

329 These observations lead us to propose a most plausible evolutionary scenario for  
330 luciferase cluster evolution across all available bioluminescent fungi genomes (**Fig. 5**).

331 The earliest ancestral state we could infer was a luciferase cluster having consisted of  
332 *luz*, *h3h*, *cyp450*, and *hisps*, with *cph*—involved in oxyluciferin recycling<sup>5,6</sup>—also  
333 present in the same chromosome. Such a combination was present in the 14 of the 15  
334 bioluminescent species used in this study. The luciferase cluster likely originally  
335 formed at the dispensable region. Our model presents two contrasting scenarios by  
336 which the luciferase cluster was retained. First, the ancestor of the family  
337 Physalacriaceae had its luciferase cluster translocated into the core region. This  
338 scenario is based on the uniform observation that all members of *Armillaria* retained  
339 the luciferase cluster in their genome, and other members of Physalacriaceae had  
340 extended synteny in adjacent genes. The cases of extended synteny, however, were  
341 derived from different genomic regions in Agaricales, indicating rearrangements  
342 (Supplementary Fig. 10). Second, the luciferase cluster in bioluminescent *Mycena* fungi  
343 was conserved, despite being located in a highly rearranged genome partition (**Fig 3a**).  
344 Such rearrangements led to higher tendency of loss of luciferase cluster in the mycenoid  
345 lineage compared to *Armillaria* species. Additional evidence of rearrangement is that  
346 four out of five bioluminescent *Mycena* fungi had at least one gene rearrangement or  
347 duplication event compared to their ancestor. Interestingly, we found that *cph* was  
348 independently translocated adjacent to the luciferase cluster in both *M. kentingensis* and  
349 the ancestor of the marasmioid clade (Supplementary Fig. 12); it was presumably  
350 favoured and maintained here by natural selection<sup>39</sup>.

351

352 **Fig. 5| Evolutionary scenario for luciferase cluster evolution.** The formation of the luciferase  
353 cluster originated at the dispensable region of the last common ancestor and was susceptible to  
354 translocate to different genomic locations through rearrangement. In the ancestor of marasmioid,  
355 *cph* was duplicated and translocated into the luciferase cluster. Before the ancestor of the  
356 Physalacriaceae family emerged, the luciferase cluster was translocated into the core region  
357 and have since kept its synteny in the *Armillaria* lineage. In the most recent common ancestor  
358 of *Mycena* species, the luciferase cluster was located in the dispensable region and have since  
359 been susceptible to further rearrangement. Arrow box indicates gene. The dashed arrow box  
360 denotes the loss of gene. Fishhook arrow denotes translocation event. <sup>a</sup> Percentage of  
361 bioluminescent fungi found in the mycenoid lineage<sup>40</sup>. <sup>b</sup> Percentage of bioluminescent fungi  
362 found in *Armillaria* lineage<sup>41</sup>.

363

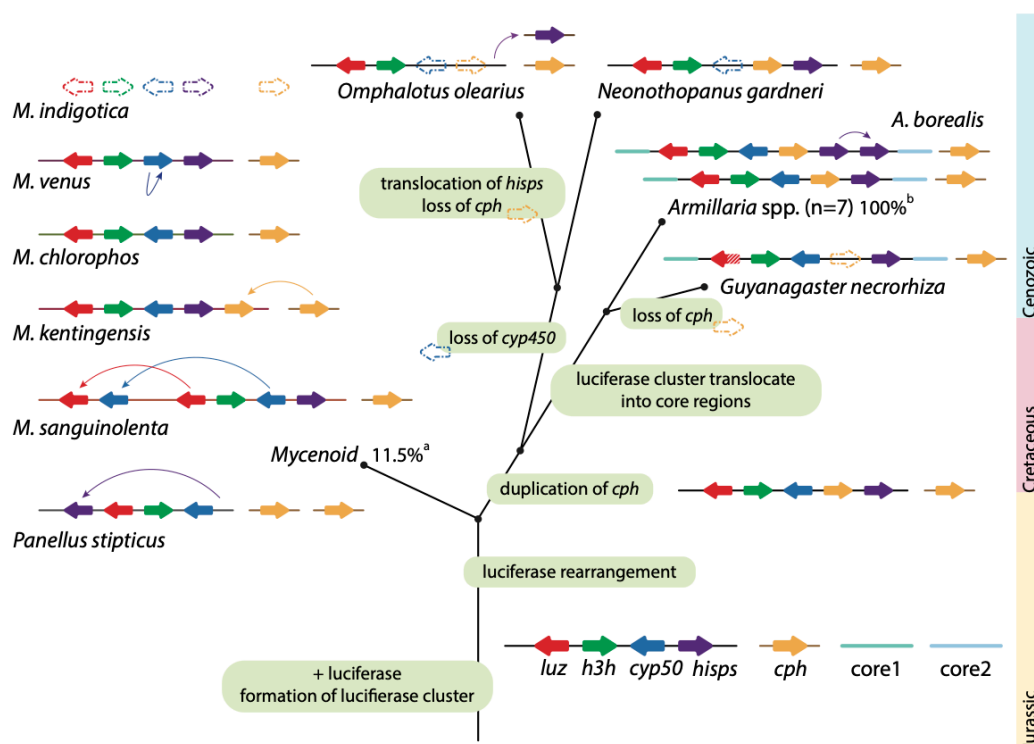

31  
365

### 366 Expression profile of luciferase cluster and identification of conserved genes 367 involved in fungal bioluminescence

368 Fungal bioluminescence is believed to have ecological roles, such as attracting insects  
369 and regulated by circadian rhythms<sup>42</sup>; however, the repertoire of genes involved in  
370 bioluminescence are still unknown. We carried out transcriptome profiling between  
371 mycelia with different bioluminescent intensities in four *Mycena* species, and identified  
372 genes that were either differentially expressed or positively correlated with  
373 bioluminescent intensities (Methods). There were 29 OGs found to contain upregulated  
374 gene members in all four *Mycena* species (Fig. 1c and Fig. 6a), including *luz*, *h3h*, and  
375 *hisps*, consistent with that bioluminescence expression depends on the expression of  
376 these three genes in the luciferase cluster. In particular, *luz* expression was significantly  
377 different between two tissues with relative high and low bioluminescence in *M.*  
378 *kentingensis* (log fold change (logFC) 3.0; adjusted  $P < 0.001$ ) and *M. chlorophos*  
379 (logFC 4.7; adjusted  $P < 0.001$ ); there was also a significant correlation between  
380 bioluminescent intensity and expression level in *M. sanguinolenta* (Pearson's  
381 correlation coefficient (PCC) 0.82;  $P < 0.005$ ) and *M. venus* (PCC 0.86;  $P < 0.005$   
382 Supplementary Table 12). In *M. chlorophos*, however, its *cyp450* and *h3h* in the  
383 luciferase cluster were not differentially expressed, and four distant homologues of *h3h*  
384 were found to be upregulated (Supplementary Fig. 5b). Although a second copy of *luz*  
385 and *cyp450* were found in *M. sanguinolenta*, they showed much lower expression (2  
386 and 3 transcripts per million (TPM), respectively) than those in the cluster (282 and 138



387 TPM, respectively). The remaining OGs upregulated in mycelia showing higher  
388 bioluminescence included genes involved in ABC transporters and Acetyl-CoA  
389 synthetases which also showed a predicted function in metabolic adaptations to  
390 bioluminescence in firefly and glowworm<sup>43,44</sup>. (**Fig. 6a**; Supplementary Table 13). In  
391 particular, four OGs were annotated as FAD or NAD(P)-binding domain-containing  
392 proteins. As these genes do not bear sequence similarity to *h3h* which is also a  
393 NAD(P)H-dependent enzyme, they may likely involve in other biochemical processes  
394 that is required during bioluminescence.

395

396 Differences in bioluminescent intensity have been recorded in tissues of fungi both in  
397 nature<sup>4,40,41,45,46</sup> and—for *M. kentingensis*—in a laboratory environment, in which the  
398 life cycle can be completed (**Fig. 6b**). To investigate putative roles of bioluminescence  
399 across developmental stages, additional transcriptome profiling was carried out in the  
400 primordia, young fruiting body, and cap (pileus) and stipe of the mature fruiting body  
401 of *M. kentingensis*. Bioluminescence was stronger in the cap than in the stipe, so we  
402 expected the luciferase cluster genes to have higher expression in the cap tissue.  
403 However, *luz* and *h3h* showed opposite expression patterns (**Fig. 6c** and Supplementary  
404 Table 14), suggesting that there may be other regulators involved in bioluminescence  
405 in *M. kentingensis*.

406

407 The regulation of bioluminescence in *M. kentingensis* during development was  
408 determined by performing a weighted correlation network analysis (WGCNA<sup>47,48</sup>),  
409 which identified 67 modules of co-expressed genes in these stages (Supplementary Fig.  
410 14). All members of the luciferase cluster *luz*, *h3h*, *cyp450*, and *hisps* belonged to the  
411 same module (Module50; **Fig. 6c**) of 57 genes, suggesting that the expression of the  
412 luciferase cluster members are orchestrated during developmental stages. Only two  
413 genes belonging to OG0001818 (acid protease) and OG0000000 (short-chain  
414 dehydrogenase) which were part of the 29 aforementioned OGs involved in  
415 bioluminescence of the mycelium across *Mycena*. Six genes in this module were  
416 annotated as carbohydrate-active enzymes (Supplementary Table 15): one GH75  
417 (chitosanase), one AA1\_2 (Laccase; ferroxidases), two GH16, and two genes with two  
418 CBM52. GH16 (glucanases) and AA1 (laccases) are known to be regulated during  
419 fruiting body development<sup>49</sup>, implying a possible link between cell wall remodelling  
420 during development and bioluminescence. In addition, we re-analysed the  
421 transcriptomes of *Armillaria ostoyae* across different developmental stages from Sipos  
422 *et al.* (2017)<sup>8</sup>. Consistent with observation that bioluminescence was only observed in  
423 mycelia and rhizomorphs in *A. ostoyae*<sup>50,51</sup>, the expression of *luz*, *h3h*, *cyp450*, and *cph*  
424 showed highest expression before the primordia stage (Supplementary Fig. 15).

425 Together, these results imply that luciferase cluster was differentially regulated during  
426 developmental stages; extent of regulation were also different in bioluminescent species  
427 of different lineages.

428

429

430

431 **Fig. 6| Expression analysis to identify genes involved in bioluminescence. a,** Conserved  
432 upregulated OGs. Differentially-expressed genes (DEGs) between mycelia with different  
433 bioluminescent intensities were identified in four bioluminescent *Mycena* species, and all 29  
434 OGs—except OG0009249 and OG0000706—contain at least one upregulated gene. A detailed  
435 annotation of the genes in the OGs is listed in Supplementary Table 13. The raw gene number  
436 in each OG is shown in Supplementary Fig. 13. **b,** Tissues used for transcriptomic data analysis  
437 in *M. kentingensis*. The left and right side are the tissues under light and dark conditions,  
438 respectively (captured by a Nikon D7000). The camera setting for each tissue: mycelium,  
439 Sigma 17-50mm ISO100 f2.8 with 16 min exposure time; primordia, AF-S Micro Nikkor 60mm  
440 ISO800 f/11 with 122.4 sec exposure time; YFB, AF-S Micro Nikkor 60mm ISO800 f/11 with  
441 60.6 sec exposure time; FB, AF-S Micro Nikkor 60mm ISO800, f/11 with 9.3 sec exposure  
442 time. YFB, young fruiting body (0.5-1 cm). FB, mature fruiting body (> 1 cm). FB-cap, cap  
443 from FB. FB-stipe, stipe from FB. **c,** Expression profile of luciferase cluster across  
444 developmental stages of *M. kentingensis*. Bold lines indicate four genes in the luciferase cluster.  
445 These four genes and the other 53 genes (yellow) were assigned into the same module  
446 (Module50) with similar expression patterns. The genes located up- or downstream (grey) of  
447 the luciferin biosynthesis cluster had lower expression levels than the four genes in the cluster.  
448

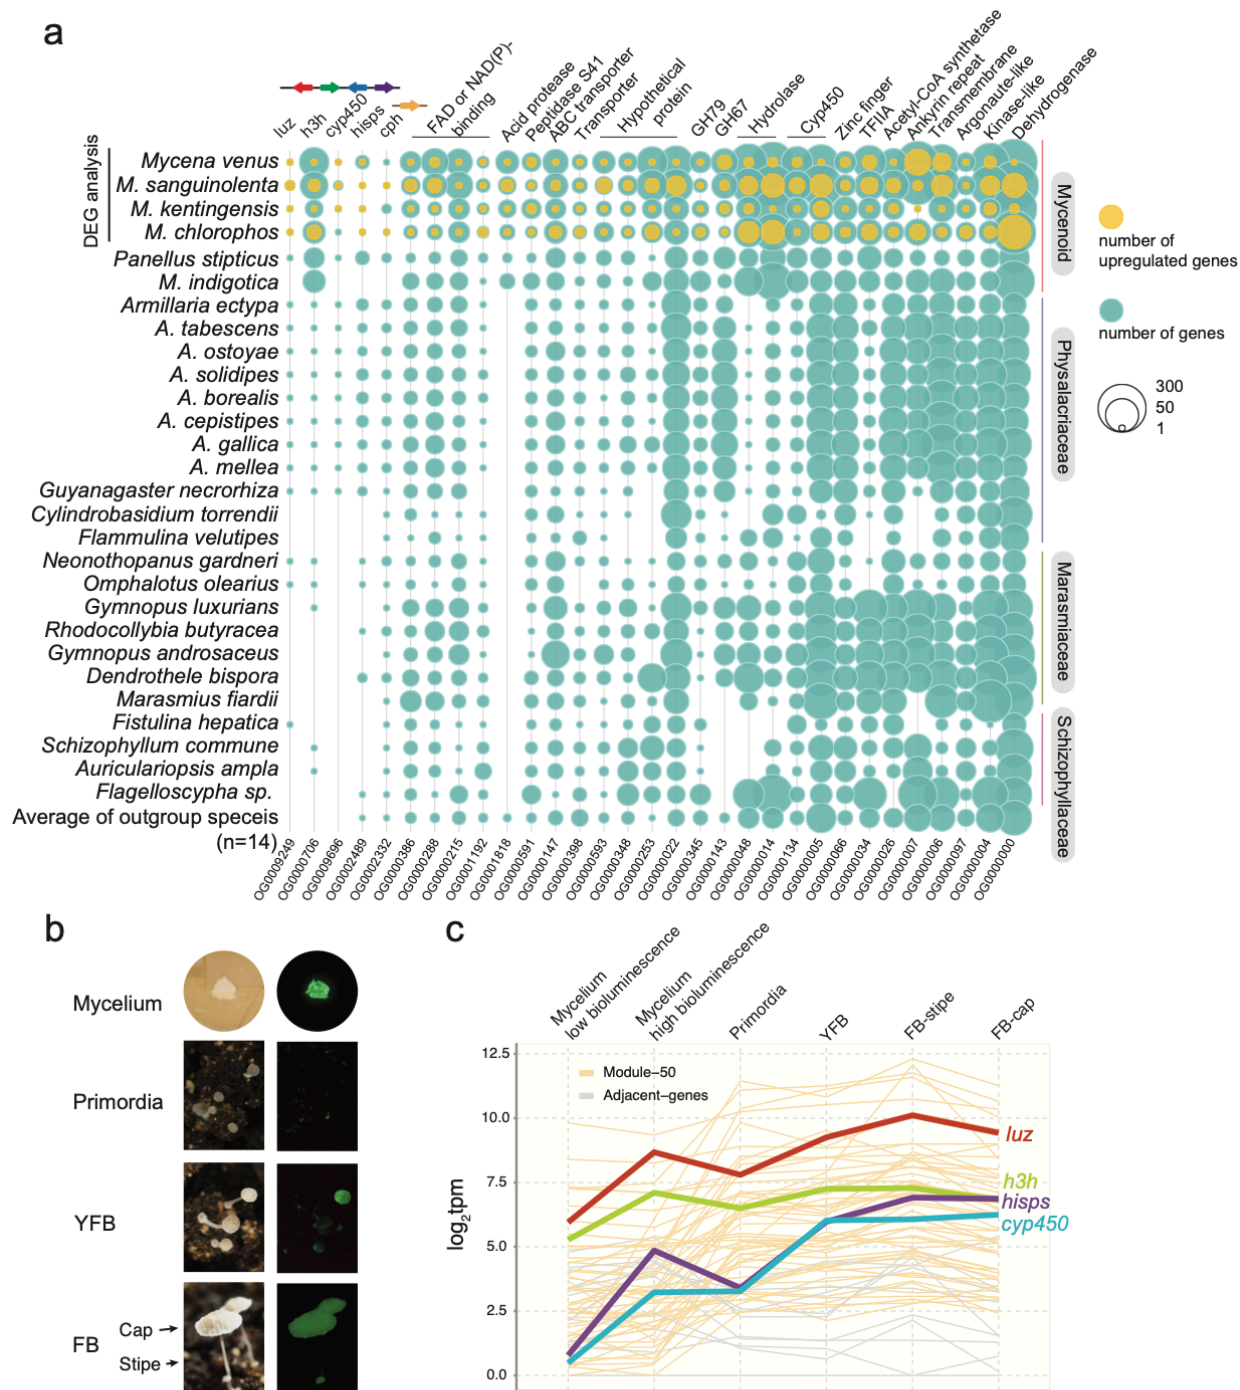

44

450

451

## 452 Gene families associated with the evolution of mycenoid species

453 We sought to identify proteins specific to mycenoid species by annotating protein  
 454 family (Pfam) domains and comparing them with those of species outside this lineage  
 455 (Supplementary Table 16). A total of 537 Pfam domains were enriched in the mycenoid  
 456 lineage (one-fold by Wilcoxon rank sum test with  $P < 0.01$ ; Supplementary Table 17) of

457 which 3–17 were species-specific. Acyl\_transf\_3 (acyltransferase family; PF01757),  
458 contained in a range of acyltransferase enzymes, was the only domain found in all six  
459 mycenoid species. The closest homologs were found in ascomycetous *Cadophora*,  
460 *Pseudogymnoascus*, or *Phialocephala* (31–35% identity with 73–100% coverage). Four  
461 of the enriched domains are known pathogenesis-related domains expanded in  
462 pathogenic Agaricales *Moniliophthora*<sup>52</sup> and *Armillaria* species<sup>8</sup>: COesterase  
463 (PF00135; Carboxylesterase family), Thaumatin (PF00314), NPP1 (PF05630;  
464 necrosis-inducing protein), and RTA1 (PF04479; RTA1-like protein) (Supplementary  
465 Fig. 16). Moreover, *M. sanguinolenta* and *M. venus* contained over 100 and 17 copies  
466 of COesterase and Thaumatin (median 37 and 4 copies in other fungal species of this  
467 study), respectively.

468

### 469 **Wood decay gene repertoires in *Mycena* species**

470 Since studies on wood degradation in *Mycena* are lacking<sup>53</sup>, we annotated the  
471 carbohydrate-active enzyme (CAZyme) repertoire of *Mycena* proteomes to understand  
472 their ecological role. Class II peroxidases (AA2) were identified in all *Mycena* species,  
473 suggesting these species can degrade lignin and leave white coloured cellulose (white  
474 rot) behind<sup>54</sup>. In particular, *M. sanguinolenta* and *M. venus* possess 66 and 72 copies of  
475 AA2, respectively, which are much higher than in other closely-related white-rot fungi,  
476 such as *Armillaria* species (10–14 copies). *Mycena* species also contain 11–20 copies  
477 of AA5\_1 (copper radical oxidases), 18–121 copies of AA3\_2 (GMC oxidoreductase),  
478 and 10–34 copies of AA1\_1 (Laccases)<sup>55</sup>. These enzymes are capable of degrading or  
479 modifying lignin and are generally in higher abundance in white-rot than in brown-rot  
480 fungi<sup>55,56</sup>. For cellulose degradation, white-rot generally has more cellulolytic genes—  
481 i.e., GH6 and GH7—and lytic polysaccharide monooxygenase of AA9 than does  
482 brown-rot fungi<sup>55</sup>. Our *Mycena* species have similar numbers of these genes as other  
483 white-rot fungi (Supplementary Fig. 17).

484

## 485 **Discussion**

486

487 Bioluminescence is one of the most unusual and fascinating traits in fungi, but the  
488 evolutionary history of luciferase cluster remains elusive. Here, we produced highly  
489 contiguous genome assemblies using Nanopore technology and annotations for five of  
490 the *Mycena* species to examine their genome dynamics. The results of phylogenomic  
491 analyses on these genomes have important implications for the origin of luciferase. We  
492 argue that luciferase originated in the last common ancestor of mycenoid and  
493 marasmioid, which disagrees the theory of Kotlobay *et al.*<sup>6</sup>, that it originated at the  
494 basal clade of Agaricales. Our results are in good general agreement with comparative

495 genomic analyses around this group<sup>8</sup>, and is the more evolutionarily parsimonious  
496 scenario that does not require an extensive loss of luciferase across the entire Agaricales  
497 lineage (**Fig. 1b** and **1c**).

498

499 Until 2019, only 68 species of bioluminescent fungi were known<sup>40</sup> across over 600 non-  
500 bioluminescent ones in Mycenaceae. Our reconstructed evolution of the luciferase  
501 cluster model shows that the luciferase cluster originated in the dispensable region of  
502 genomes (**Fig. 3**), making it susceptible to rearrangement, which suggests it is highly  
503 prone to loss and explains why most mycenoid species are non-bioluminescent. This is  
504 consistent with a previous report that the main evolutionary process in fungal gene  
505 clusters is vertical evolution followed by differential loss<sup>57</sup>. Interestingly, synteny was  
506 retained in luciferase clusters and adjacent genes of *Armillaria* species (**Fig. 4**), which  
507 are better known for their roles as plant pathogens<sup>8</sup>. Indeed, bioluminescence was  
508 identified in all nine examined *Armillaria* species<sup>41</sup>. We speculate that the majority of  
509 unquantified *Armillaria* species may also exhibit bioluminescence. The repeated  
510 duplication and relocation of *cph* that we observed in the luciferase cluster is under  
511 selection pressure, suggesting that bioluminescence has adaptive importance in these  
512 species. A systematic quantification of bioluminescence and more complete genome  
513 assemblies will help reconstruct the evolutionary events that contributed to the  
514 polymorphism and functional diversity in the luciferase clusters.

515

516 Chromosome-length polymorphisms are uncommon in Agaricales but have been  
517 observed in the pathogen *Moniliophthora perniciosa*<sup>58</sup> causing witches' broom disease  
518 and model mushroom *Coprinopsis cinerea*<sup>59</sup>. Synteny analyses across *Mycena* genomes  
519 revealed the first documented case of 'two speed' genomes in the Agaricales. Despite  
520 all the studied *Mycena* species are saprotrophs, the compartmentalization of genomes  
521 exhibiting contrasting evolutionary scenarios and the presence of lineage-specific  
522 chromosomes are hallmarks of plant pathogens throughout fungal tree of life<sup>60</sup>. We  
523 argue that in addition to gene family expansion and adaptation due to diversifying  
524 lifestyle, the increased rates of evolution in particular regions have also led to higher  
525 propensity to the loss of luciferase cluster in the mycenoid lineage. Two of the five  
526 *Mycena* species had large genomes, which was a result of a transposable element  
527 expansion and gene family dynamics (**Fig. 1d**). In plants, animals and fungi, DNA  
528 methylation is known to suppress TE activity<sup>61,62</sup>. In *Mycena*, we observed numerous  
529 relic TEs containing sequences similar to classic TEs but lacking functional domains,  
530 and these relic TEs had lower levels of CG methylation than did the classic TEs (**Fig.**  
531 **2b**). We hypothesize that the relic TEs were still repressed by DNA methylation,  
532 yielding overall lower levels of CG methylation in active TEs, which consequently



533 resulted in genome expansion and increased dispensable region offering more plasticity  
534 in their evolution.

535

536 Researchers have long been puzzled over the ecological role of bioluminescence in  
537 fungi. One explanation that has been put forth for *Neonothopanus gardneri* is that  
538 bioluminescence follows a circadian rhythm to increase spore dispersal by attracting  
539 arthropods in the evening<sup>42</sup>. If true, this is most likely a derived adaptation, as most  
540 Agaricomycetes like *Omphalotus nidiformis* disperse spores via wind, display  
541 bioluminescence continuously, and do not attract insects<sup>63</sup>. Besides, attraction is  
542 insufficient to explain luminescence in the mycelium. *Mycena kentingensis* and  
543 *Armillaria ostoyae* are thought to constitutively express the luciferase cluster  
544 throughout development<sup>64</sup>. In addition to the luciferase cluster, only a handful of genes  
545 were identified to associate with fungal bioluminescence (**Fig6**). If fungal  
546 bioluminescence originated as a by-product of a biological process that is currently  
547 unknown, the ecological role was likely to be initially limited and has undergone  
548 subsequent losses in many species, especially in the *Mycena* lineage. For those that  
549 have retained bioluminescence, we speculate that its ecological role may be species-  
550 specific and together converge on the maintenance of luciferase cluster.

551

552 In summary, our comparative analyses have led us to propose an evolutionary model  
553 pinpointing changes in the luciferase cluster across all published bioluminescent  
554 species. Our findings offer insights into the evolution of a gene cluster spanning over  
555 160 million years and the retained luciferases were under strong purifying selection.  
556 Our *Mycena* genome sequences may complement ongoing research on the application  
557 of bioluminescent pathways<sup>6</sup> and shed light on the ecological role of bioluminescence  
558 in fungi.

559

## 560 **Methods**

561

### 562 **Strains and fungal materials**

563 *M. kentingensis*, *M. venus*, *M. sanguinolenta*, *M. indigotica* and *M. chlorophos* were  
564 isolated from fruiting bodies collected from forest in Taiwan. *M. indigotica* was  
565 isolated from basidiospores. The mycelia were grown and maintained on potato  
566 dextrose agar (PDA) plates at 25°C. To identify the pattern of bioluminescence, a  
567 piece of mycelium from each species was inoculated in the centre of a sheet of  
568 sterilized dialysis cellulose membrane (8030-32, Cellu Sep T-Series) on a 3 cm PDA  
569 agar plate at 25°C. The diameter of the mycelium was measured and its

570 bioluminescence was recorded with a Glomax 20/20 luminometer (Promega  
571 BioSystems Sunnyvale, Inc., USA) for seven days (Supplementary Table18). The  
572 taxonomic status of species was reconfirmed by sequencing the internal transcribed  
573 spacer (ITS) with the primer pair SR6R(5'-AAGWAAAAGTCGTAACAAGG-  
574 3')/ITS4(5'-TCCTCCGCTTATTGATATGC-3'). Using the other available *Mycena*  
575 ITS sequences, all sequences were aligned by MAFFT<sup>65</sup> (ver. 7.310) and trimmed by  
576 trimAl<sup>66</sup> (1.2rev59; with option -automated1). The ITS phylogeny was constructed by  
577 IQ-TREE<sup>67,68</sup> (ver. 1.6.10; with option -bb 10000 -alrt 1000).

578

### 579 **Genomic DNA extraction and sequencing**

580 Genomic DNA was extracted using the traditional CTAB and chloroform extraction  
581 method. Briefly, 0.1 g mycelium was grinded with liquid nitrogen and then mixed with  
582 CTAB extraction buffer (0.1 M tris, 0.7 M NaCl, 10 mM EDTA, 1% CTAB, 1% Beta-  
583 Mercaptoethanol). After incubating at 65°C for 30 min, an equal volume of chloroform  
584 was added, then the mixture was centrifuged at 8000 rcf for 10 min. The supernatant  
585 was mixed with an equal volume of isopropanol and the DNA was precipitated. After  
586 washing with 70% EtOH, the DNA was dissolved with nuclease free water. Genome  
587 sequencing was carried out in two platforms. First, paired-end libraries were  
588 constructed using the KAPA LTP library preparation kits (#KK8232, KAPA  
589 Biosystems). All libraries were prepared in the High Throughput Genomics Core at  
590 Biodiversity Research Center, Academia Sinica and sequenced on an Illumina HiSeq  
591 2500 platform. A total of 51.6 Gb of 150- or 300-bp read pairs were generated. Second,  
592 Oxford Nanopore libraries were prepared using SQK-LSK108 and sequenced on a  
593 GridION instrument. Basecalling of Nanopore raw signals was performed using Guppy  
594 (ver. 3.2.4) into a total 67.7 Gb of raw sequences at least 1 kb or longer. A summary of  
595 the sequencing data is shown in Supplementary Table 1.

596

### 597 **RNA extraction and sequencing**

598 Bioluminescent mycelia were collected in two ways. i) For *M. chlorophos* and *M.*  
599 *kentingensis*, a piece of mycelium was inoculated at the centre of a sheet of sterilized  
600 dialysis cellulose membrane (8030-32, Cellu Sep T-Series) on PDA agar plates at 25°C.  
601 The plates were cultured for 10 and 14–18 days for *M. chlorophos* and *M. kentingensis*,  
602 respectively. For *M. kentingensis*, bioluminescence was detected by camera (Nikon  
603 D7000, Sigma 17-50mm ISO100 f2.8 with 16 min exposure time) (**Fig. 6b**). The  
604 mycelia with low or high bioluminescent intensities which occurred spontaneously  
605 were collected from two separated plates inoculated on the same day. In *M. chlorophos*,  
606 bioluminescence was detected by luminometer. Mycelium with low bioluminescence  
607 showed the intensity of 7-14 Relative Light Unit (RLU)/mg, and the mycelium with

608 high bioluminescence showed the intensity of 5,000-10,000 RLU/mg (Supplementary  
609 Table 3). Three replicates were collected. ii) For *M. sanguinolenta* and *M. venus*, a piece  
610 of mycelium was inoculated at the centre of a sheet of sterilized dialysis cellulose  
611 membrane on PDA agar plates at 25°C. The plates were cultured for 13–17 days, and  
612 the bioluminescent features were detected by CCD camera; the tissues were collected  
613 and their luminescence intensity was recorded with a Glomax 20/20 luminometer  
614 (Promega BioSystems Sunnyvale, Inc., USA). A total of 12 samples with different  
615 bioluminescence intensities were collected (Supplementary Table 3). After  
616 homogenizing 5–10 mg of tissues by liquid nitrogen, total RNA was extracted using  
617 the Direct-zol RNA Miniprep (Zymo Research). Concentrations were measured by  
618 Qubit fluorometer (Invitrogen USA), and quality was assessed by the BioAnalyzer  
619 2100 RNA Nano kit (Agilent, USA) with RIN values higher than 8.0. The paired-end  
620 libraries were constructed using the TruSeq Stranded mRNA library prep kit  
621 (#20020594, Illumina, San Diego, USA) with standard protocol and sequenced by  
622 Illumina HiSeq 2500 (Illumina, USA) to produce 150-bp paired-end reads.

623

#### 624 **RNA extraction and sequencing from the *M. kentingensis* fruiting body**

625 Fruiting body production of *M. kentingensis* was modified from previous studies<sup>69,70</sup>.  
626 Mycelia, grown on PDA for 8–15 days, was then inoculated onto sterilized  
627 commercially available peat soil mixed with 10% rice bran and 50% water in a jar.  
628 Mycelium samples were grown at 25°C for 3–4 weeks and then transferred into fresh  
629 compost. The culture was sprayed with sterilized water daily until the fruiting body  
630 formed. Four kinds of tissue were collected: (1) primordia, (2) young fruiting body  
631 (YFB, 0.5–1 cm), (3) cap and (4) stipe of mature fruiting body (> 1 cm). For each batch  
632 of culture, 15–20 primordia, 6–11 YFB, and 8–12 caps and stipes from mature fruiting  
633 bodies were pooled to measure their weight and bioluminescent intensity, and the RNA  
634 was extracted using Trizol extraction and lithium chloride purification method. Three  
635 replicates were produced. The paired-end libraries were constructed using the TruSeq  
636 Stranded mRNA library prep kit (#20020594, Illumina, San Diego, USA) with standard  
637 protocol and sequenced by Illumina HiSeq 2500 (Illumina, USA) to produce 150-bp  
638 paired-end reads.

639

#### 640 ***De novo* assemblies of *Mycena* species**

641 Oxford Nanopore reads were assembled using the Canu<sup>71</sup> (ver. 1.8) assembler.  
642 Consensus sequences of the assemblies were polished first by five iterations of Racon<sup>72</sup>  
643 (ver. 1.3.2) followed by Medaka (ver. 0.7.1; <https://github.com/nanoporetech/medaka>)  
644 using Oxford Nanopore reads. HaploMerger2<sup>73</sup> (ver. 20180603) was then run on to  
645 generate haploid assemblies. Finally, the consensus sequences were further corrected

646 with Illumina reads using Pilon<sup>74</sup> (ver. 1.22). Throughout each stage the genome  
647 completeness was assessed using fungi and basidiomycete dataset of BUSCO<sup>15</sup> (ver.  
648 3.0.2). Putative telomeric repeats were searched for copy number repeats less than 10  
649 mers using tandem repeat finder<sup>75</sup> (ver. 4.09; options: 2 7 7 80 10 50 500). The hexamer  
650 TTAGGG was identified (Supplementary Table 19).

651

## 652 **Gene predictions and functional annotation**

653

654 Protein sequences from Uniprot fungi (32,991 sequences; downloaded 20<sup>th</sup> December  
655 2018) and *Coprinopsis cinerea*, *Pleurotus ostreatus* PC15 (v2.0), *Schizophyllum*  
656 *commune* and *Armillaria mellea* from MycoCosm<sup>76</sup> portal were downloaded as  
657 reference proteome. Transcriptome reads were first mapped to the corresponding  
658 genome assemblies using STAR<sup>77,78</sup> (ver. 2.5.3a), and subsequently assembled into  
659 transcripts using Trinity<sup>79</sup> (ver. 2.3.2; guided approach), Stringtie<sup>80</sup> (ver. 1.3.1c),  
660 CLASS2<sup>81</sup> (ver. 2.1.7) and Cufflinks<sup>82</sup> (ver. 2.2.1). The samples used for input are listed  
661 in Supplementary Table 3. Transcripts generated from Trinity were aligned to the  
662 references using GMAP<sup>83</sup>. All transcripts were merged, filtered and picked using  
663 MIKADO<sup>84</sup> (ver. 1.1). The gene predictor Augustus<sup>85</sup> (ver. 3.2.1) and gmhmm<sup>86</sup> (ver.  
664 3.56) were trained using BRAKER2<sup>87</sup> (option fungi and softmasked), and SNAP<sup>88</sup> was  
665 trained using the assembled transcripts with MAKER2<sup>14</sup> (ver. 2.31.9). The assembled  
666 transcripts, reference proteomes and BRAKER2 annotations were combined as  
667 evidence hints for input in the MAKER2<sup>14</sup> annotation pipeline. MAKER2<sup>14</sup> invoked  
668 the three trained gene predictors to generate a final set of gene annotation. Amino acid  
669 sequences of the proteome were functionally annotated using Blast2GO<sup>89</sup> and eggno-  
670 mapper<sup>90</sup> (ver. 1.0.3).

671

## 672 **Identification of repetitive elements**

673 Consensus (library) sequences of repetitive elements were identified using the  
674 pipeline described in Berriman *et al*<sup>91</sup>. Full LTR retrotransposons in *Mycena* species  
675 were defined as i) initially identified by LTRharvest<sup>92</sup> and ii) presence of known  
676 reverse transcriptase domains identified by Pfam<sup>93</sup> (ver. 31.0). Repeat contents were  
677 quantified using RepeatMasker<sup>94</sup> (ver. open-4.0.7). Proportions of repeat content  
678 along the scaffolds were calculated using Bedtools<sup>95</sup>. A phylogenetic tree was built by  
679 first aligning all the putative RVT domain sequences using MAFFT<sup>65</sup> (ver. 7.310; --  
680 genafpair --ep 0) and FastTree<sup>96</sup> with the JTT model on the aligned sequences, and  
681 were visualised using the ggtree<sup>97</sup> package in R.

682

## 683 **Methylation analyses**

684 To construct a BS-seq library, the fragmented DNA was first ligated with a  
685 premethylated TruSeq DNA adapter (Illumina). The ligated DNA fragments were  
686 bisulfite converted using the EZ DNA methylation kit (Zymo Research), followed by  
687 PCR amplification. The BS-seq libraries were sequenced on an Illumina HiSeq 2500  
688 sequencer. The bisulfite conversion efficiency reached approximately 99% in all of our  
689 libraries (Supplementary Table 20). High-quality paired-end reads were aligned to the  
690 genome assemblies of *M. kentingensis* using the bisulfite specific aligner BS-Seeker<sup>298</sup>.  
691 Only uniquely mapped reads were retained. The cytosines covered by at least four reads  
692 were included in the data analysis, and the DNA methylation level for each cytosine  
693 was estimated as  $\#C/(\#C+\#T)$ , where  $\#C$  is the number of methylated reads and  $\#T$  is  
694 the number of unmethylated reads.

695

696 One or two Nanopore flowcells for each *Mycena* species were selected to infer  
697 methylation information using deepsignal<sup>99</sup> (ver. 0.1.5) (*M. kentingensis*: FAH31207,  
698 *M. chlorophos*: FAH31470, *M. indigotica*: FAH31228, *M. sanguinolenta*: FAK22405  
699 and FAH31211, *M. venus*: FAK22389 and FAH31302). The machine learning-based  
700 model was trained with one bisulfite dataset (YJMC0389) and one Nanopore dataset  
701 (FAH31207) of *M. kentingensis*. The bisulfite result was first filtered for depth  $>20$ ,  
702 then methylation levels  $>0.9$  and  $<0.01$  were selected for positive and negative  
703 validation datasets, respectively. All seven flowcells were called for methylation  
704 information with a customized model and default arguments. A minimal depth of 4 was  
705 applied to the results for further analysis. In the estimates of DNA methylation levels  
706 between Nanopore long-reads and the Illumina BS-seqs, the Pearson correlation  
707 coefficient was as high as 0.96 in the methylomes of *M. kentingensis* (Supplementary  
708 Fig. 18).

709

710

### 711 **Orthogroup inference and analysis of protein family domains**

712 Orthologous groups (OGs) among 42 species were identified using OrthoFinder<sup>16,17</sup>  
713 (ver. 2.2.7). CAFÉ<sup>18</sup> (ver. 4.2.1) was used to predict the expansion and contraction of  
714 gene numbers of OGs based on the topological gene tree. Unique OGs among the  
715 node identified by CAFÉ were analysed by UpSetR<sup>100</sup>. The phylogenetic tree was  
716 visualized by the ggtree<sup>97,101</sup> package in R. Protein domains of each gene were  
717 identified by pfam\_scan.pl ver. 1.6 by comparing them against Pfam ver. 32.0 db<sup>93</sup>. To  
718 compare them to plant pathogenic fungi, the Pfam domains from *Moniliophthora*  
719 *perniciosa* FA55313 (Monpe1\_1)<sup>52</sup> from JGI and *Moniliophthora roreri* (Monro)  
720 from BioProject: PRJNA279170 were also annotated. Enrichment of Pfam domain  
721 number between two sets of interest was assessed by the Wilcoxon rank-sum test ( $P \leq$



722 0.05). We compared the Pfam copy number between six mycenoid species and the  
723 other 37 species. Gene ontology enrichments were identified for these genes using  
724 TopGO<sup>102</sup>. Genes encoding carbohydrate-active enzymes were identified according to  
725 the Carbohydrate-Active enZYmes (CAZy) Database<sup>103</sup> by searching for sequence  
726 homologs with DIAMOND<sup>104</sup> or HMMER<sup>105</sup>.

727

### 728 **Phylogenomic analyses**

729 A total of 42 sets of amino acid sequences from 360 single-copy OGs were aligned  
730 independently using MAFFT<sup>65</sup> (ver. 7.271; option --maxiterate 1000). A total of three  
731 approaches were used to infer the species tree. The first two approaches relied on  
732 maximum likelihood phylogenies from individual OG alignments computed using  
733 RAxML-ng<sup>106</sup> (ver. 0.9.0; options: --all --model LG+I+F+G4 --seed 1234 --tree pars 10  
734 --bs-trees 100) with 100 bootstrap replicates. The best phylogeny and bootstrap  
735 replicates were separately used to infer a consensus tree using ASTRAL-III<sup>20</sup>. Finally,  
736 a maximum likelihood phylogeny from the concatenated amino acid alignments of the  
737 single-copy orthogroups was constructed with 100 bootstrap replicates using RAxML-  
738 ng<sup>106</sup> (ver. 0.9.0; options: --all --seed 1234 --tree pars 10 --bs-trees 100 with --model  
739 LG+I+F+G4 partitioned with each OG alignment).

740

### 741 **Estimation of divergence time**

742 The divergence time of each tree node was inferred using MCMCtree in PAML<sup>21</sup>  
743 package (ver. 4.9g with approximate likelihood<sup>107</sup>; the JC69 model and the rest were  
744 default). The species tree and concatenated translated nucleotide alignments of 360  
745 single-copy-orthologs were used as the input for MCMCtree. The phylogeny was  
746 calibrated using fossil records by placing soft minimum bounds at the ancestral node  
747 of: i) marasmioid (using *Archaeomarasmius legettii* 94–90 Ma<sup>108</sup>; 90 was used), ii)  
748 Agaricales (using *Palaeoagaricites antiquus* 110–100 Ma<sup>109</sup>; 100 was used), iii) Taxon  
749 A (~99 Ma<sup>110</sup>; 95 was used), and iv) a soft bound of 200 Ma for the phylogeny. The  
750 entire analysis was run five times to check for convergence.

751

752

### 753 **Synteny analyses**

754 Linkage groups (LGs) between *M. indigotica* and *Armillaria ectypa*, and between *M.*  
755 *indigotica* and *Pleurotus ostreatus* were assigned based on the majority of the single-  
756 copy orthologues (Supplementary Figure 7 and 8). Scaffolds containing fewer than 10  
757 single-copy orthologues, shorter than 500 kb or species N90 were excluded. Linkage  
758 groups within *Mycena* were assigned based on majority and at least 10% of single-copy  
759 orthologue links with *M. indigotica* scaffolds. Subsequent scaffolds were identified as

760 the same linkage group if they contained a majority of pairwise one-to-one single-copy  
761 orthologues belonging to the *M. indigotica* LG.

762

763 As gene collinearity among *Mycena* species became less conserved, synteny blocks of  
764 each *Mycena* species were defined based on merging of adjacent pairwise single-copy  
765 orthologues to its closest-related species. For instance, synteny blocks of *M. chlorophos*  
766 were based on single-copy orthologues against *M. indigotica*. For every ortholog, the  
767 distance to the next closest single-copy orthologue was calculated to take into account  
768 segment duplications of genes or gene insertion/deletions. Synteny blocks within the  
769 90% quantile of ortholog distance were further merged and classified as core regions.  
770 Dispensable regions were defined as synteny breaks under this criterion. Based on these  
771 criteria, 68.5–85.5% of the genomes of *Mycena* species were dispensable  
772 (Supplementary Table 21). Synteny around luciferase cluster was based on orthogroup  
773 sharing and plotted using the R genoPlotR<sup>111</sup> package.

774

775

#### 776 **Evolution of gene families related to the luciferase gene cluster**

777 The sequences of five orthologues in the luciferase family—hispidin-3-hydroxylase,  
778 cytochrome P450, hispidin synthase, and caffeylpyruvate hydrolase—were  
779 constructed and the sequences were aligned by MAFFT<sup>65</sup> (ver. 7.310) and trimmed by  
780 trimAl<sup>66</sup> (1.2rev59 ; with option -automated1). The protein trees were constructed by  
781 IQ-TREE<sup>67,68</sup> (ver. 1.6.10; with option -bb 10000 -alrt 1000). The evidence for  
782 selection across gene families was tested using the HyPhy<sup>112,113</sup> platform in the  
783 webserver of datamonkey<sup>114-116</sup>. According to the recombination breakpoints analysed  
784 by the Genetic Algorithm for Recombination Detection<sup>117</sup> (GARD), the alignment  
785 was trimmed for analysing selection using Single-Likelihood Ancestor Counting<sup>118</sup>  
786 (SLAC) and Mixed Effects Model of Evolution<sup>119</sup> (MEME) with  $P < 0.1$ .

787

788

#### 789 **RNAseq analysis of differential bioluminescent mycelium**

790 Quality trimming of the RNA sequencing reads was conducted using Trimmomatic<sup>120</sup>.  
791 The sequencing reads were mapped to the genome using STAR<sup>77,78</sup> (ver.  
792 STAR\_2.5.1b\_modified; default parameters). Raw read counts of the gene models were  
793 quantified by FeatureCounts<sup>121</sup> (ver. v1.5.0; -p -s 2 -t exon). For *M. kentingensis* and *M.*  
794 *chlorophos*, the differential expressed genes (DEGs) were analysed using DESeq2<sup>122</sup>.  
795 Genes with fold change (FC)  $> 0$  and FDR  $\leq 0.05$  were defined as DEG. For *M.*  
796 *sanguinolenta* and *M. venus*, the DEGs were identified by the Pearson correlation  
797 coefficient between the bioluminescence intensity (relative light unit; RLU) normalized

798 by weight (RLU/mg) and log transformation of counts per million. Genes with  
799 correlation coefficient  $> 0.7$  and  $P < 0.01$  were defined as DEGs.

800

### 801 **RNA analysis of *M. kentingensis* and *Armillaria ostoyae* developmental stages**

802 The reads from transcriptomes of the primordia, young fruiting body, and cap and stipe  
803 of mature fruiting body were conducted by the same method of manipulating the reads  
804 from transcriptomes of mycelium. To identify co-expressed genes among  
805 transcriptomes, the transformation of transcripts per million (TPM) from six different  
806 tissues—mycelia with high bioluminescence and low bioluminescence, primordia,  
807 young fruiting body, and fruiting body cap and stipe were calculated. The lowest 25%  
808 expressed gene across all samples were excluded and co expression was analysed using  
809 weighted gene co-expression network analysis (WGCNA)<sup>47,48</sup> package in R  
810 (maxBlockSize = 10000, power = 20, networkType = signed , TOMType = signed,  
811 minModuleSize = 30). The Illumina reads among ten stages from *Armillaria ostoyae*  
812 were also downloaded from NCBI's GEO Archive (<http://www.ncbi.nlm.nih.gov/geo>  
813 [under accession GSE100213](#)) and also analysed by the same pipeline of *M. kentingensis*  
814 to identify co-expressed genes among the transcriptomes.

815

816

817

818

819

820

821

822

823

### 824 **Authors contribution**

825 I.J.T. and H.M.K. conceived the study. I.J.T. led the study. H.M.K., C.C.C., G.S. and  
826 H.W.K. collected and identified *Mycena* species around Taiwan. H.M.K, P.H.W. and  
827 C.I.L. conducted the experiments. M.J.L. and J.Y.L. designed the illumina sequencing  
828 experiment. H.H.L. and I.J.T. performed the assemblies and annotations of the *Mycena*  
829 genomes. H.M.K., H.H.L., Y.C.L. and I.J.T. conducted the repeat analysis. L.C.N. and  
830 I.J.T. carried out phylogenomics analyses and the divergence time estimation. H.M.K.,  
831 H.H.L., Y.C.L. and I.J.T. carried out comparative genomic analyses. H.M.K. and M.R.L.  
832 analysed the RNA-seq data. H.H.L., R.J.L., J.W.H., P.Y.C. and H.M.K. carried out the  
833 methylation analyses. H.M.K. and I.J.T. wrote the manuscript with input from L.C.N  
834 and P.Y.C.

835

## 836 **Acknowledgement**

837 We thank Chia-Ning Shen for lending us the luminometer for the duration of the project.  
838 We thank Bi-Chang Chen for providing the CCD camera to qualify bioluminescence.  
839 We thank Chi-Yu Chen and Jie-Hao Ou for their useful advice on culturing *Mycena*  
840 fungi. We are grateful to the '1000 Fungal Genomes – Deep Sequencing of  
841 Ecologically-relevant Dikarya' consortium for access to unpublished genome data. We  
842 thank Gregory Bonito, Hui-Ling Liao, Alejandro Rojas and Rytas Vilgalys for  
843 permission to use the *Flagelloscypha* sp. FlaPMI526\_1 assembly from JGI. We thank  
844 Mary Catherine Aime for permission to use the *G. necrorhiza* MCA 3950. assembly  
845 from JGI. The genome sequence data were produced by the US Department of Energy  
846 Joint Genome Institute (JGI) in collaboration with the user community. We thank Chia-  
847 Lin Chung, Ben-Yang Liao and John Wang for commenting the earlier version of the  
848 manuscript. P.Y.C was supported by Ministry of Science and Technology, Taiwan,  
849 under Grant No. 106-2311-B-001 -035 -MY3 and 108-2313-B-001 -013 -MY3. H.M.K  
850 was supported by postdoctoral fellowship, Academia Sinica. I.J.T was supported by  
851 Career Development Award AS-CDA-107-L01, Academia Sinica.

852

## 853 **Data availability**

854 Genome assembly and annotation of five *Mycena* species was deposited in the National  
855 Centre for Biotechnology Information BioProject database (accession no.  
856 PRJNA623720) pending final checks.

857

858

859

860

861

## 862 **References**

863

- 864 1 He, M. *et al.* Notes, outline and divergence times of Basidiomycota. *Fungal*  
865 *Diversity*, doi:10.1007/s13225-019-00435-4 (2019).
- 866 2 Wei, C. & Kirschner, R. A new *Mycena* species with blue basidiomata and  
867 poroid hymenophore from Taiwan. *Mycoscience* **60**, 10-13,  
868 doi:10.1016/j.myc.2018.06.001 (2019).
- 869 3 Thoen, E. *et al.* In vitro evidence of root colonization suggests ecological  
870 versatility in the genus *Mycena*. *New Phytologist*, doi:10.1111/nph.16545  
871 (2020).
- 872 4 Chew, A., Desjardin, D., Tan, Y., Musa, M. & Sabaratnam, V. Bioluminescent  
873 fungi from Peninsular Malaysia-a taxonomic and phylogenetic overview.

- 874 *Fungal Diversity* **70**, 149-187, doi:10.1007/s13225-014-0302-9 (2015).
- 875 5 Kaskova, Z. M. *et al.* Mechanism and color modulation of fungal  
876 bioluminescence. *Sci Adv* **3**, e1602847, doi:10.1126/sciadv.1602847 (2017).
- 877 6 Kotlobay, A. A. *et al.* Genetically encodable bioluminescent system from fungi.  
878 *Proc Natl Acad Sci U S A* **115**, 12728-12732, doi:10.1073/pnas.1803615115  
879 (2018).
- 880 7 Varga, T. *et al.* Megaphylogeny resolves global patterns of mushroom evolution.  
881 *Nat Ecol Evol* **3**, 668-678, doi:10.1038/s41559-019-0834-1 (2019).
- 882 8 Sipos, G. *et al.* Genome expansion and lineage-specific genetic innovations in  
883 the forest pathogenic fungi *Armillaria*. *Nat Ecol Evol* **1**, 1931-1941,  
884 doi:10.1038/s41559-017-0347-8 (2017).
- 885 9 Floudas, D. *et al.* Evolution of novel wood decay mechanisms in Agaricales  
886 revealed by the genome sequences of *Fistulina hepatica* and *Cylindrobasidium*  
887 *torrendii*. *Fungal Genet Biol* **76**, 78-92, doi:10.1016/j.fgb.2015.02.002 (2015).
- 888 10 Park, Y. J. *et al.* Whole genome and global gene expression analyses of the  
889 model mushroom *Flammulina velutipes* reveal a high capacity for  
890 lignocellulose degradation. *PloS one* **9**, e93560,  
891 doi:10.1371/journal.pone.0093560 (2014).
- 892 11 Liu, D., Hunt, M. & Tsai, I. J. Inferring synteny between genome assemblies: a  
893 systematic evaluation. *Bmc Bioinformatics* **19**, 26, doi:10.1186/s12859-018-  
894 2026-4 (2018).
- 895 12 Heinzlmann, R., Rigling, D., Sipos, G., Münsterkötter, M. & Croll, D.  
896 Chromosomal assembly and analyses of genome-wide recombination rates in  
897 the forest pathogenic fungus *Armillaria ostoyae*. *Heredity*, doi:10.1038/s41437-  
898 020-0306-z (2020).
- 899 13 Perez, G., Pangilinan, J., Pisabarro, A. G. & Ramirez, L. Telomere organization  
900 in the ligninolytic basidiomycete *Pleurotus ostreatus*. *Appl Environ Microbiol*  
901 **75**, 1427-1436, doi:10.1128/AEM.01889-08 (2009).
- 902 14 Holt, C. & Yandell, M. MAKER2: an annotation pipeline and genome-database  
903 management tool for second-generation genome projects. *BMC bioinformatics*  
904 **12**, 491, doi:10.1186/1471-2105-12-491 (2011).
- 905 15 Simão, F. A., Waterhouse, R. M., Ioannidis, P., Kriventseva, E. V. & Zdobnov,  
906 E. M. BUSCO: assessing genome assembly and annotation completeness with  
907 single-copy orthologs. *Bioinformatics* **31**, 3210-3212,  
908 doi:10.1093/bioinformatics/btv351 (2015).
- 909 16 Emms, D. M. & Kelly, S. OrthoFinder: phylogenetic orthology inference for  
910 comparative genomics. *Genome Biol* **20**, 238, doi:10.1186/s13059-019-1832-y  
911 (2019).



- 912 17 Emms, D. M. & Kelly, S. OrthoFinder: solving fundamental biases in whole  
913 genome comparisons dramatically improves orthogroup inference accuracy.  
914 *Genome Biol* **16**, 157, doi:10.1186/s13059-015-0721-2 (2015).
- 915 18 De Bie, T., Cristianini, N., Demuth, J. P. & Hahn, M. W. CAFE: a computational  
916 tool for the study of gene family evolution. *Bioinformatics* **22**, 1269-1271,  
917 doi:10.1093/bioinformatics/btl097 (2006).
- 918 19 Stamatakis, A. RAxML-VI-HPC: maximum likelihood-based phylogenetic  
919 analyses with thousands of taxa and mixed models. *Bioinformatics (Oxford,*  
920 *England)* **22**, 2688-2690, doi:10.1093/bioinformatics/btl446 (2006).
- 921 20 Mirarab, S. & Warnow, T. ASTRAL-II: coalescent-based species tree estimation  
922 with many hundreds of taxa and thousands of genes. *Bioinformatics* **31**, i44-52,  
923 doi:10.1093/bioinformatics/btv234 (2015).
- 924 21 Yang, Z. PAML 4: phylogenetic analysis by maximum likelihood. *Mol Biol Evol*  
925 **24**, 1586-1591, doi:10.1093/molbev/msm088 (2007).
- 926 22 Lupia, R., Lidgard, S. & Crane, P. Comparing palynological abundance and  
927 diversity: implications for biotic replacement during the Cretaceous angiosperm  
928 radiation. *Paleobiology* **25**, 305-340, doi:10.1017/S009483730002131X (1999).
- 929 23 Duplessis, S. *et al.* Obligate biotrophy features unraveled by the genomic  
930 analysis of rust fungi. *Proceedings of the National Academy of Sciences of the*  
931 *United States of America* **108**, 9166-9171, doi:10.1073/pnas.1019315108  
932 (2011).
- 933 24 Zheng, A. *et al.* The evolution and pathogenic mechanisms of the rice sheath  
934 blight pathogen. *Nature Communications* **4**, doi:10.1038/ncomms2427 (2013).
- 935 25 Stajich, J. E. *et al.* Insights into evolution of multicellular fungi from the  
936 assembled chromosomes of the mushroom *Coprinopsis cinerea* (*Coprinus*  
937 *cinereus*). *Proceedings of the National Academy of Sciences of the United States*  
938 *of America* **107**, 11889-11894, doi:10.1073/pnas.1003391107 (2010).
- 939 26 Chung, C. L. *et al.* Comparative and population genomic landscape of *Phellinus*  
940 *noxius*: A hypervariable fungus causing root rot in trees. *Mol Ecol*,  
941 doi:10.1111/mec.14359 (2017).
- 942 27 Zhang, X. *et al.* Genome-wide high-resolution mapping and functional analysis  
943 of DNA methylation in arabidopsis. *Cell* **126**, 1189-1201,  
944 doi:10.1016/j.cell.2006.08.003 (2006).
- 945 28 Wang, Y. P., Wang, X. Y., Lee, T. H., Mansoor, S. & Paterson, A. H. Gene body  
946 methylation shows distinct patterns associated with different gene origins and  
947 duplication modes and has a heterogeneous relationship with gene expression  
948 in *Oryza sativa* (rice). *New Phytologist* **198**, 274-283, doi:10.1111/nph.12137  
949 (2013).

- 950 29 Montanini, B. *et al.* Non-exhaustive DNA methylation-mediated transposon  
951 silencing in the black truffle genome, a complex fungal genome with massive  
952 repeat element content. *Genome Biol* **15**, 411, doi:10.1186/s13059-014-0411-5  
953 (2014).
- 954 30 Jones, P. A. Functions of DNA methylation: islands, start sites, gene bodies and  
955 beyond. *Nat Rev Genet* **13**, 484-492, doi:10.1038/nrg3230 (2012).
- 956 31 Elango, N., Hunt, B. G., Goodisman, M. A. D. & Yi, S. V. DNA methylation is  
957 widespread and associated with differential gene expression in castes of the  
958 honeybee, *Apis mellifera*. *P Natl Acad Sci USA* **106**, 11206-11211,  
959 doi:10.1073/pnas.0900301106 (2009).
- 960 32 Bewick, A. J. *et al.* Diversity of cytosine methylation across the fungal tree of  
961 life. *Nat Ecol Evol* **3**, 479-490, doi:10.1038/s41559-019-0810-9 (2019).
- 962 33 Willing, E. M. *et al.* Genome expansion of *Arabis alpina* linked with  
963 retrotransposition and reduced symmetric DNA methylation. *Nat Plants* **1**,  
964 14023, doi:10.1038/nplants.2014.23 (2015).
- 965 34 Wang, H. *et al.* CG gene body DNA methylation changes and evolution of  
966 duplicated genes in cassava. *Proc Natl Acad Sci U S A* **112**, 13729-13734,  
967 doi:10.1073/pnas.1519067112 (2015).
- 968 35 Ma, L. J. *et al.* Comparative genomics reveals mobile pathogenicity  
969 chromosomes in *Fusarium*. *Nature* **464**, 367-373, doi:10.1038/nature08850  
970 (2010).
- 971 36 Deshpande, A. R., Pochapsky, T. C. & Ringe, D. The Metal Drives the  
972 Chemistry: Dual Functions of Acireductone Dioxygenase. *Chem Rev* **117**,  
973 10474-10501, doi:10.1021/acs.chemrev.7b00117 (2017).
- 974 37 Dong, S., Raffaele, S. & Kamoun, S. The two-speed genomes of filamentous  
975 pathogens: waltz with plants. *Curr Opin Genet Dev* **35**, 57-65,  
976 doi:10.1016/j.gde.2015.09.001 (2015).
- 977 38 Pedersen, B. S. & Quinlan, A. R. Mosdepth: quick coverage calculation for  
978 genomes and exomes. *Bioinformatics* **34**, 867-868,  
979 doi:10.1093/bioinformatics/btx699 (2018).
- 980 39 Rokas, A., Wisecaver, J. H. & Lind, A. L. The birth, evolution and death of  
981 metabolic gene clusters in fungi. *Nat Rev Microbiol*, doi:10.1038/s41579-018-  
982 0075-3 (2018).
- 983 40 Cortes-Perez, A. *et al.* New species and records of bioluminescent *Mycena* from  
984 Mexico. *Mycologia* **111**, 319-338, doi:10.1080/00275514.2018.1554172 (2019).
- 985 41 Mihail, J. D. Bioluminescence patterns among North American *Armillaria*  
986 species. *Fungal Biol* **119**, 528-537, doi:10.1016/j.funbio.2015.02.004 (2015).
- 987 42 Oliveira, A. G. *et al.* Circadian control sheds light on fungal bioluminescence.

- 988 *Curr Biol* **25**, 964-968, doi:10.1016/j.cub.2015.02.021 (2015).
- 989 43 Sharpe, M. L., Dearden, P. K., Gimenez, G. & Krause, K. L. Comparative RNA  
990 seq analysis of the New Zealand glowworm *Arachnocampa luminosa* reveals  
991 bioluminescence-related genes. *BMC Genomics* **16**, 825, doi:10.1186/s12864-  
992 015-2006-2 (2015).
- 993 44 Fallon, T. R. *et al.* Firefly genomes illuminate parallel origins of  
994 bioluminescence in beetles. *Elife* **7**, doi:10.7554/eLife.36495 (2018).
- 995 45 Desjardin, D. E., Oliveira, A. G. & Stevani, C. V. Fungi bioluminescence  
996 revisited. *Photochem Photobiol Sci* **7**, 170-182, doi:10.1039/b713328f (2008).
- 997 46 Bermudes, D., Petersen, R. H. & Nealon, K. H. Low-Level Bioluminescence  
998 Detected in *Mycena-Haematopus* Basidiocarps. *Mycologia* **84**, 799-802,  
999 doi:Doi 10.2307/3760392 (1992).
- 1000 47 Zhang, B. & Horvath, S. A general framework for weighted gene co-expression  
1001 network analysis. *Stat Appl Genet Mol Biol* **4**, Article17, doi:10.2202/1544-  
1002 6115.1128 (2005).
- 1003 48 Langfelder, P. & Horvath, S. WGCNA: an R package for weighted correlation  
1004 network analysis. *Bmc Bioinformatics* **9**, 559, doi:10.1186/1471-2105-9-559  
1005 (2008).
- 1006 49 Krizsan, K. *et al.* Transcriptomic atlas of mushroom development reveals  
1007 conserved genes behind complex multicellularity in fungi. *Proc Natl Acad Sci*  
1008 *U S A* **116**, 7409-7418, doi:10.1073/pnas.1817822116 (2019).
- 1009 50 Harvey, E. N. *Bioluminescence*. (Academic Press, 1952).
- 1010 51 Wassink, E. C. in *Bioluminescence in action* (ed P.J. Herring) 171–197  
1011 (Academic Press, 1978).
- 1012 52 Mondego, J. M. *et al.* A genome survey of *Moniliophthora perniciosa* gives new  
1013 insights into Witches' Broom Disease of cacao. *BMC Genomics* **9**, 548,  
1014 doi:10.1186/1471-2164-9-548 (2008).
- 1015 53 Worrall, J. J., Anagnost, S. E. & Zabel, R. A. Comparison of wood decay among  
1016 diverse lignicolous fungi. *Mycologia* **89**, 199-219 (1996).
- 1017 54 Floudas, D. *et al.* The Paleozoic origin of enzymatic lignin decomposition  
1018 reconstructed from 31 fungal genomes. *Science* **336**, 1715-1719,  
1019 doi:10.1126/science.1221748 (2012).
- 1020 55 Riley, R. *et al.* Extensive sampling of basidiomycete genomes demonstrates  
1021 inadequacy of the white-rot/brown-rot paradigm for wood decay fungi.  
1022 *Proceedings of the National Academy of Sciences*,  
1023 doi:10.1073/pnas.1400592111 (2014).
- 1024 56 Miyauchi, S. *et al.* Integrative visual omics of the white-rot fungus *Polyporus*  
1025 *brumalis* exposes the biotechnological potential of its oxidative enzymes for

- 1026 delignifying raw plant biomass. *Biotechnol Biofuels* **11**, 201,  
1027 doi:10.1186/s13068-018-1198-5 (2018).
- 1028 57 Marcet-Houben, M. & Gabaldon, T. Evolutionary and functional patterns of  
1029 shared gene neighbourhood in fungi. *Nat Microbiol* **4**, 2383-2392,  
1030 doi:10.1038/s41564-019-0552-0 (2019).
- 1031 58 Rincones, J. *et al.* Genetic variability and chromosome-length polymorphisms  
1032 of the witches' broom pathogen *Crinipellis pernicioso* from various plant hosts  
1033 in South America. *Mycological Research* **110**, 821-832,  
1034 doi:10.1016/j.mycres.2006.05.002 (2006).
- 1035 59 Zolan, M. E., Heyler, N. K. & Stassen, N. Y. Inheritance of chromosome-length  
1036 polymorphisms in *Coprinus cinereus*. *Genetics* **137**, 87-94 (1994).
- 1037 60 Moller, M. & Stukenbrock, E. H. Evolution and genome architecture in fungal  
1038 plant pathogens. *Nat Rev Microbiol*, doi:10.1038/nrmicro.2017.76 (2017).
- 1039 61 Zamudio, N. & Bourc'his, D. Transposable elements in the mammalian  
1040 germline: a comfortable niche or a deadly trap? *Heredity (Edinb)* **105**, 92-104,  
1041 doi:10.1038/hdy.2010.53 (2010).
- 1042 62 Zemach, A., McDaniel, I. E., Silva, P. & Zilberman, D. Genome-Wide  
1043 Evolutionary Analysis of Eukaryotic DNA Methylation. *Science* **328**, 916-919,  
1044 doi:10.1126/science.1186366 (2010).
- 1045 63 Weinstein, P., Delean, S., Wood, T. & Austin, A. D. Bioluminescence in the  
1046 ghost fungus *Omphalotus nidiformis* does not attract potential spore dispersing  
1047 insects. *IMA Fungus* **7**, 229-234, doi:10.5598/imafungus.2016.07.02.01 (2016).
- 1048 64 Purto, K. V., Petushkov, V. N., Rodionova, N. S. & Gitelson, J. I. Why does the  
1049 bioluminescent fungus *Armillaria mellea* have luminous mycelium but  
1050 nonluminous fruiting body? *Dokl Biochem Biophys* **474**, 217-219,  
1051 doi:10.1134/S1607672917030176 (2017).
- 1052 65 Katoh, K. & Standley, D. M. MAFFT multiple sequence alignment software  
1053 version 7: improvements in performance and usability. *Molecular biology and  
1054 evolution* **30**, 772-780, doi:10.1093/molbev/mst010 (2013).
- 1055 66 Capella-Gutierrez, S., Silla-Martinez, J. M. & Gabaldon, T. trimAl: a tool for  
1056 automated alignment trimming in large-scale phylogenetic analyses.  
1057 *Bioinformatics* **25**, 1972-1973, doi:10.1093/bioinformatics/btp348 (2009).
- 1058 67 Nguyen, L. T., Schmidt, H. A., von Haeseler, A. & Minh, B. Q. IQ-TREE: a fast  
1059 and effective stochastic algorithm for estimating maximum-likelihood  
1060 phylogenies. *Molecular biology and evolution* **32**, 268-274,  
1061 doi:10.1093/molbev/msu300 (2015).
- 1062 68 Hoang, D. T., Chernomor, O., von Haeseler, A., Minh, B. Q. & Vinh, L. S.  
1063 UFBoot2: Improving the Ultrafast Bootstrap Approximation. *Molecular*

- 1064 *biology and evolution* **35**, 518-522, doi:10.1093/molbev/msx281 (2018).
- 1065 69 Mori, K., Kojima, S., Maki, S., Hirano, T. & Niwa, H. Bioluminescence  
1066 characteristics of the fruiting body of *Mycena chlorophos*. *Luminescence* **26**,  
1067 604-610, doi:10.1002/bio.1280 (2011).
- 1068 70 Shih, Y. S., Chen, C. Y., Lin, W. W. & Kao, H. W. *Mycena kentingensis*, a new  
1069 species of luminous mushroom in Taiwan, with reference to its culture method.  
1070 *Mycol Prog* **13**, 429-435, doi:DOI 10.1007/s11557-013-0939-x (2014).
- 1071 71 Koren, S. *et al.* Canu: scalable and accurate long-read assembly via adaptive k-  
1072 mer weighting and repeat separation. *Genome Res* **27**, 722-736,  
1073 doi:10.1101/gr.215087.116 (2017).
- 1074 72 Vaser, R., Sović, I., Nagarajan, N. & Šikić, M. Fast and accurate de novo  
1075 genome assembly from long uncorrected reads. *Genome Res* **27**, 737-746,  
1076 doi:10.1101/gr.214270.116 (2017).
- 1077 73 Huang, S., Kang, M. & Xu, A. HaploMerger2: rebuilding both haploid sub-  
1078 assemblies from high-heterozygosity diploid genome assembly. *Bioinformatics*,  
1079 doi:10.1093/bioinformatics/btx220 (2017).
- 1080 74 Walker, B. J. *et al.* Pilon: an integrated tool for comprehensive microbial variant  
1081 detection and genome assembly improvement. *Plos One* **9**, e112963,  
1082 doi:10.1371/journal.pone.0112963 (2014).
- 1083 75 Benson, G. Tandem repeats finder: a program to analyze DNA sequences.  
1084 *Nucleic Acids Res* **27**, 573-580 (1999).
- 1085 76 Grigoriev, I. V. *et al.* MycoCosm portal: gearing up for 1000 fungal genomes.  
1086 *Nucleic Acids Res* **42**, D699-704, doi:10.1093/nar/gkt1183 (2014).
- 1087 77 Dobin, A. *et al.* STAR: ultrafast universal RNA-seq aligner. *Bioinformatics* **29**,  
1088 15-21, doi:10.1093/bioinformatics/bts635 (2013).
- 1089 78 Dobin, A. & Gingeras, T. R. Mapping RNA-seq Reads with STAR. *Curr Protoc*  
1090 *Bioinformatics* **51**, 11 14 11-11 14 19, doi:10.1002/0471250953.bi1114s1  
1091 (2015).
- 1092 79 Haas, B. J. *et al.* De novo transcript sequence reconstruction from RNA-seq  
1093 using the Trinity platform for reference generation and analysis. *Nat Protoc* **8**,  
1094 1494-1512, doi:10.1038/nprot.2013.084 (2013).
- 1095 80 Pertea, M. *et al.* StringTie enables improved reconstruction of a transcriptome  
1096 from RNA-seq reads. *Nat Biotechnol* **33**, 290-295, doi:10.1038/nbt.3122 (2015).
- 1097 81 Song, L., Sabunciyan, S. & Florea, L. CLASS2: accurate and efficient splice  
1098 variant annotation from RNA-seq reads. *Nucleic Acids Res* **44**, e98,  
1099 doi:10.1093/nar/gkw158 (2016).
- 1100 82 Trapnell, C. *et al.* Differential gene and transcript expression analysis of RNA-  
1101 seq experiments with TopHat and Cufflinks. *Nature protocols* **7**, 562-578,



- 1102 doi:10.1038/nprot.2012.016 (2012).
- 1103 83 Wu, T. D. & Watanabe, C. K. GMAP: a genomic mapping and alignment  
1104 program for mRNA and EST sequences. *Bioinformatics* **21**, 1859-1875,  
1105 doi:10.1093/bioinformatics/bti310 (2005).
- 1106 84 Venturini, L., Caim, S., Kaithakottil, G. G., Mapleson, D. L. & Swarbreck, D.  
1107 Leveraging multiple transcriptome assembly methods for improved gene  
1108 structure annotation. *GigaScience* **7**, giy093, doi:10.1093/gigascience/giy093  
1109 (2018).
- 1110 85 Stanke, M., Tzvetkova, A. & Morgenstern, B. AUGUSTUS at EGASP: using  
1111 EST, protein and genomic alignments for improved gene prediction in the  
1112 human genome. *Genome Biol* **7**, S11, doi:10.1186/gb-2006-7-s1-s11 (2006).
- 1113 86 Ter-Hovhannisyanyan, V., Lomsadze, A., Chernoff, Y. O. & Borodovsky, M. Gene  
1114 prediction in novel fungal genomes using an ab initio algorithm with  
1115 unsupervised training. *Genome Research* **18**, 1979-1990,  
1116 doi:10.1101/gr.081612.108 (2008).
- 1117 87 Hoff, K. J., Lange, S., Lomsadze, A., Borodovsky, M. & Stanke, M. BRAKER1:  
1118 unsupervised RNA-Seq-Based genome annotation with GeneMark-ET and  
1119 AUGUSTUS. *Bioinformatics* **32**, 767-769, doi:10.1093/bioinformatics/btv661  
1120 (2016).
- 1121 88 Korf, I. Gene finding in novel genomes. *BMC Bioinformatics* **5**, 59,  
1122 doi:10.1186/1471-2105-5-59 (2004).
- 1123 89 Conesa, A. *et al.* Blast2GO: a universal tool for annotation, visualization and  
1124 analysis in functional genomics research. *Bioinformatics* **21**, 3674-3676,  
1125 doi:10.1093/bioinformatics/bti610 (2005).
- 1126 90 Huerta-Cepas, J. *et al.* Fast genome-wide functional annotation through  
1127 orthology assignment by eggNOG-Mapper. *Mol Biol Evol* **34**, 2115-2122,  
1128 doi:10.1093/molbev/msx148 (2017).
- 1129 91 Berriman, M., Coghlan, A. & Jason Tsai, I. J. Creation of a comprehensive  
1130 repeat library for a newly sequenced parasitic worm genome. *Protocol*  
1131 *Exchange*, doi:10.1038/protex.2018.054 (2018).
- 1132 92 Ellinghaus, D., Kurtz, S. & Willhoeft, U. LTRharvest, an efficient and flexible  
1133 software for de novo detection of LTR retrotransposons. *BMC bioinformatics* **9**,  
1134 18, doi:10.1186/1471-2105-9-18 (2008).
- 1135 93 El-Gebali, S. *et al.* The Pfam protein families database in 2019. *Nucleic Acids*  
1136 *Res* **47**, D427-D432, doi:10.1093/nar/gky995 (2019).
- 1137 94 Smit, A., Hubley, R. & Green, P. *RepeatMasker Open-4.0*. (2013-2015).
- 1138 95 Quinlan, A. R. & Hall, I. M. BEDTools: a flexible suite of utilities for comparing  
1139 genomic features. *Bioinformatics* **26**, 841-842,

- 1140 doi:10.1093/bioinformatics/btq033 (2010).
- 1141 96 Price, M. N., Dehal, P. S. & Arkin, A. P. FastTree 2-approximately maximum-  
1142 likelihood trees for large alignments. *Plos One* **5**, e9490, doi:ARTN e9490  
1143 10.1371/journal.pone.0009490 (2010).
- 1144 97 Yu, G., Lam, T., Zhu, H. & Guan, Y. Two Methods for Mapping and Visualizing  
1145 Associated Data on Phylogeny Using Ggtree. *Molecular Biology and Evolution*  
1146 **35**, 3041-3043, doi:10.1093/molbev/msy194 (2018).
- 1147 98 Guo, W. *et al.* BS-Seeker2: a versatile aligning pipeline for bisulfite sequencing  
1148 data. *BMC Genomics* **14**, 774, doi:10.1186/1471-2164-14-774 (2013).
- 1149 99 Ni, P. *et al.* DeepSignal: detecting DNA methylation state from Nanopore  
1150 sequencing reads using deep-learning. *Bioinformatics* **35**, 4586-4595,  
1151 doi:10.1093/bioinformatics/btz276 (2019).
- 1152 100 Conway, J. R., Lex, A. & Gehlenborg, N. UpSetR: an R package for the  
1153 visualization of intersecting sets and their properties. *Bioinformatics* **33**, 2938-  
1154 2940, doi:10.1093/bioinformatics/btx364 (2017).
- 1155 101 Yu, G., Smith, D., Zhu, H., Guan, Y. & Lam, T. T. ggtree: an R package for  
1156 visualization and annotation of phylogenetic trees with their covariates and  
1157 other associated data. *Methods Ecol Evol* **8**, doi:10.1111/2041-210X.12628  
1158 (2017).
- 1159 102 Alexa, A., Rahnenfuhrer, J. & Lengauer, T. Improved scoring of functional  
1160 groups from gene expression data by decorrelating GO graph structure.  
1161 *Bioinformatics* **22**, 1600-1607, doi:10.1093/bioinformatics/btl140 (2006).
- 1162 103 Lombard, V., Golaconda Ramulu, H., Drula, E., Coutinho, P. M. & Henrissat,  
1163 B. The carbohydrate-active enzymes database (CAZy) in 2013. *Nucleic Acids*  
1164 *Res* **42**, D490-495, doi:10.1093/nar/gkt1178 (2014).
- 1165 104 Buchfink, B., Xie, C. & Huson, D. H. Fast and sensitive protein alignment using  
1166 DIAMOND. *Nat Methods* **12**, 59-60, doi:10.1038/nmeth.3176 (2015).
- 1167 105 Finn, R. D., Clements, J. & Eddy, S. R. HMMER web server: interactive  
1168 sequence similarity searching. *Nucleic Acids Res* **39**, W29-37,  
1169 doi:10.1093/nar/gkr367 (2011).
- 1170 106 Kozlov, A., Darriba, D., Flouri, T., Morel, B. & Stamatakis, A. RAxML-NG: a  
1171 fast, scalable and user-friendly tool for maximum likelihood phylogenetic  
1172 inference. *Bioinformatics* **35**, 4453-4455, doi:10.1093/bioinformatics/btz305  
1173 (2019).
- 1174 107 dos Reis, M. & Yang, Z. Approximate Likelihood Calculation on a Phylogeny  
1175 for Bayesian Estimation of Divergence Times. *Molecular Biology and*  
1176 *Evolution* **28**, 2161-2172, doi:10.1093/molbev/msr045 (2011).
- 1177 108 Kumar, S., Stecher, G., Suleski, M. & Hedges, S. B. TimeTree: a resource for

- 1178 timelines, timetrees, and divergence times. *Mol Biol Evol* **34**, 1812-1819,  
1179 doi:10.1093/molbev/msx116 (2017).
- 1180 109 Poinar, G. & Buckley, R. Evidence of mycoparasitism and  
1181 hypermycoparasitism in Early Cretaceous amber. *Mycological Research* **111**,  
1182 503-506, doi:10.1016/j.mycres.2007.02.004 (2007).
- 1183 110 Cai, C., Leschen, R., Hibbett, D., Xia, F. & Huang, D. Mycophagous rove  
1184 beetles highlight diverse mushrooms in the Cretaceous. *Nature*  
1185 *Communications* **8**, doi:10.1038/ncomms14894 (2017).
- 1186 111 Guy, L., Kultima, J. R. & Andersson, S. G. genoPlotR: comparative gene and  
1187 genome visualization in R. *Bioinformatics* **26**, 2334-2335,  
1188 doi:10.1093/bioinformatics/btq413 (2010).
- 1189 112 Kosakovsky Pond, S. L. *et al.* HyPhy 2.5-A Customizable Platform for  
1190 Evolutionary Hypothesis Testing Using Phylogenies. *Molecular biology and*  
1191 *evolution* **37**, 295-299, doi:10.1093/molbev/msz197 (2020).
- 1192 113 Pond, S. L., Frost, S. D. & Muse, S. V. HyPhy: hypothesis testing using  
1193 phylogenies. *Bioinformatics* **21**, 676-679, doi:10.1093/bioinformatics/bti079  
1194 (2005).
- 1195 114 Weaver, S. *et al.* Datamonkey 2.0: A Modern Web Application for  
1196 Characterizing Selective and Other Evolutionary Processes. *Molecular biology*  
1197 *and evolution* **35**, 773-777, doi:10.1093/molbev/msx335 (2018).
- 1198 115 Delport, W., Poon, A. F., Frost, S. D. & Kosakovsky Pond, S. L. Datamonkey  
1199 2010: a suite of phylogenetic analysis tools for evolutionary biology.  
1200 *Bioinformatics* **26**, 2455-2457, doi:10.1093/bioinformatics/btq429 (2010).
- 1201 116 Pond, S. L. & Frost, S. D. Datamonkey: rapid detection of selective pressure on  
1202 individual sites of codon alignments. *Bioinformatics* **21**, 2531-2533,  
1203 doi:10.1093/bioinformatics/bti320 (2005).
- 1204 117 Kosakovsky Pond, S. L., Posada, D., Gravenor, M. B., Woelk, C. H. & Frost, S.  
1205 D. GARD: a genetic algorithm for recombination detection. *Bioinformatics* **22**,  
1206 3096-3098, doi:10.1093/bioinformatics/btl474 (2006).
- 1207 118 Kosakovsky Pond, S. L. & Frost, S. D. Not so different after all: a comparison  
1208 of methods for detecting amino acid sites under selection. *Molecular biology*  
1209 *and evolution* **22**, 1208-1222, doi:10.1093/molbev/msi105 (2005).
- 1210 119 Murrell, B. *et al.* Detecting individual sites subject to episodic diversifying  
1211 selection. *Plos Genet* **8**, e1002764, doi:10.1371/journal.pgen.1002764 (2012).
- 1212 120 Bolger, A. M., Lohse, M. & Usadel, B. Trimmomatic: a flexible trimmer for  
1213 Illumina sequence data. *Bioinformatics* **30**, 2114-2120,  
1214 doi:10.1093/bioinformatics/btu170 (2014).
- 1215 121 Liao, Y., Smyth, G. K. & Shi, W. featureCounts: an efficient general purpose

1216 program for assigning sequence reads to genomic features. *Bioinformatics* **30**,  
1217 923-930, doi:10.1093/bioinformatics/btt656 (2014).  
1218 122 Meinhardt, L. W. *et al.* Genome and secretome analysis of the hemibiotrophic  
1219 fungal pathogen, *Moniliophthora roreri*, which causes frosty pod rot disease of  
1220 cacao: mechanisms of the biotrophic and necrotrophic phases. *BMC Genomics*  
1221 **15**, 164, doi:10.1186/1471-2164-15-164 (2014).  
1222  
1223
